# Supplementary material
Source: PubMed Central journal article supplement (PMC7189804)
Supplement: NIHMS966504-supplement-supplement_1.pdf [file NIHMS966504-supplement-supplement_1.pdf]

Table E1. Thirteen studies that contributed to the GWAS of allergic disease reported by Ferreira et al. 2017.

| Study          | Study-type            | Original case ascertainment | N total | N controls | Number of cases |                            |        |        |                   |        |        |                         |        | N cases with co-morbidity | Age (mean, range)                         | % Females               | Mean age-of-onset (range) |             |             |        |  |
|----------------|-----------------------|-----------------------------|---------|------------|-----------------|----------------------------|--------|--------|-------------------|--------|--------|-------------------------|--------|---------------------------|-------------------------------------------|-------------------------|---------------------------|-------------|-------------|--------|--|
|                |                       |                             |         |            | Total           | With only a single disease |        |        | With two diseases |        |        | With all three diseases |        |                           |                                           |                         | Unclassifiable#           | Asthma      | Hay fever   | Eczema |  |
|                |                       |                             |         |            |                 | A+H+E-                     | A-H+E- | A-H+E+ | A+H+E-            | A+H+E+ | A-H+E+ | A+H+E+                  | A+H+E+ |                           |                                           |                         |                           |             |             |        |  |
| UKBiobank      | Population-based      | NA                          | 138354  | 96108      | 42246           | 8769                       | 4838   | 1538   | 1661              | 596    | 439    | 364                     | 24041  | 3060                      | 56.7 (39-73)                              | 53                      | 30.3 (1-73)               | 24.4 (1-70) | 25.6 (1-69) |        |  |
| 23andMe        | Population-based      | NA                          | 118269  | 34934      | 83335           | 2048                       | 26125  | 3648   | 8574              | 365    | 4193   | 3610                    | 34772  | 16742                     | 49.5 (1-114)                              | 48                      | 20.8 (0-93)               | NA          | 23.6 (0-96) |        |  |
| GERA           | Population-based      | NA                          | 51218   | 15999      | 35219           | 4439                       | 17401  | 2297   | 7836              | 416    | 1839   | 991                     | 0      | 11082                     | 62.3 (18-90)                              | 59                      | NA                        | NA          | NA          |        |  |
| CATSS          | Population-based      | NA                          | 11068   | 7488       | 3580            | 1600                       | 380    | 681    | 387               | 240    | 98     | 194                     | 0      | 919                       | 9.8 (9-23)                                | 49                      | 4.2 (0-23)                | 5.0 (0-11)  | 1.5 (0-11)  |        |  |
| NTR            | Population-based      | NA                          | 10242   | 7919       | 2323            | 685                        | 837    | 219    | 421               | 64     | 48     | 49                      | 0      | 582                       | 40.1 (4-94)                               | 64                      | NA                        | NA          | NA          |        |  |
| LifeLines      | Population-based      | NA                          | 8560    | 4837       | 3723            | 190                        | 1718   | 897    | 245               | 58     | 468    | 113                     | 34     | 884                       | 46.2 (18-88)                              | 58                      | 17.8 (0-66)               | 23.4 (0-88) | NA          |        |  |
| TWINGENE       | Population-based      | NA                          | 5517    | 3762       | 1755            | 1007                       | 418    | 79     | 219               | 21     | 5      | 6                       | 0      | 251                       | 58.3 (41-93)                              | 51                      | 54.1 (0-93)               | 24.9 (0-72) | 1.5 (0-45)  |        |  |
| ALSPAC§        | Population-based      | NA                          | 4964    | 2330       | 2634            | 373                        | 620    | 374    | 224               | 139    | 187    | 187                     | 530    | 737                       | A/E: 10.8 (10-13); H: 13.9 (13-16)        | 49                      | NA                        | NA          | NA          |        |  |
| SALTY          | Population-based      | NA                          | 4062    | 2761       | 1301            | 583                        | 365    | 79     | 226               | 27     | 14     | 7                       | 0      | 274                       | 49.8 (41-72)                              | 49                      | 41.6 (0-72)               | 20.3 (0-52) | 8.9 (0-46)  |        |  |
| AAGC           | Selected case-control | Asthma                      | 2435    | 460        | 1975            | 393                        | 124    | 32     | 701               | 156    | 14     | 555                     | 0      | 1426                      | 35.1 (3-89)                               | 56                      | 15.5 (0-75)               | NA          | 6.7 (0-40)  |        |  |
| GENEVA         | Selected case-control | Eczema                      | 2633    | 1274       | 1359            | 41                         | 154    | 383    | 29                | 65     | 309    | 289                     | 89     | 692                       | 43.9 (0-85)                               | 56                      | NA                        | NA          | 11.7 (0-85) |        |  |
| GENUFAD-SHIP-1 | Selected case-control | Eczema                      | 1781    | 1364       | 417             | 0                          | 0      | 323    | 0                 | 46     | 26     | 22                      | 0      | 94                        | Cases: 3.9 (1-34); Controls: 50.0 (20-81) | Cases: 39; Controls: 50 | 7 (1-31)                  | 8 (2-31)    | 1 (0-2)     |        |  |
| GENUFAD-SHIP-2 | Selected case-control | Eczema                      | 1735    | 1473       | 262             | 0                          | 0      | 169    | 0                 | 35     | 27     | 31                      | 0      | 93                        | Cases: 8.3 (1-26); Controls: 50.0 (20-81) | Cases: 54; Controls: 50 | 11 (2-24)                 | 13 (1-26)   | 1 (0-2)     |        |  |
| Total          |                       |                             | 360838  | 180709     | 180129          | 20128                      | 52980  | 10719  | 20523             | 2228   | 7667   | 6418                    | 59466  | 36836                     |                                           |                         |                           |             |             |        |  |

# Individuals with missing information for at least one disease could not be classified into one of the seven three-disease groups.

§ For ALSPAC, information from different surveys was used to define asthma (A) and eczema (E) when compared to those used to define hay fever. For this reason, age of participants is reported separately for A/E and H.

**Table E2. Genome-wide association studies of gene expression levels queried to identify expression quantitative trait loci (i.e. eQTL)**

| First author | PMID     | Tissue/cell type       | Sample size | cis effects |                                         |
|--------------|----------|------------------------|-------------|-------------|-----------------------------------------|
|              |          |                        |             | N genes     | N associations $P < 2.3 \times 10^{-9}$ |
| Andiappan    | 26259071 | NEUTROPHILS            | 114         | 310         | 3776                                    |
| Barreiro     | 22233810 | DENDRITIC-NotInfected  | 65          | 36          | 36                                      |
|              |          | DENDRITIC-TBInfected   | 65          | 216         | 216                                     |
| Battle       | 24092820 | WHOLE-BLOOD            | 922         | 7792        | 7793                                    |
|              |          | WHOLE-BLOOD-ase        | 922         | 310         | 537                                     |
|              |          | WHOLE-BLOOD-splice     | 922         | 532         | 818                                     |
| Brumpton     | 27155841 | LCLS                   | 356         | 27          | 2139                                    |
| Caliskan     | 25874939 | PBMCS-baseline         | 98          | 173         | 173                                     |
|              |          | PBMCS-rhinovirus       | 98          | 169         | 169                                     |
|              |          | PBMCS-rhinovirus-reQTL | 98          | 12          | 12                                      |
| Davenport    | 26917434 | LEUCOCYTES             | 265         | 879         | 7699                                    |
| Dimas        | 19644074 | LCLS                   | 75          | 97          | 121                                     |
|              |          | TCELLS                 | 75          | 85          | 107                                     |
|              |          | FIBROBLASTS            | 75          | 102         | 136                                     |
|              |          | WHOLE-BLOOD            | 149         | 1195        | 2220                                    |
| Di Narzo     | 27336838 | WHOLE-BLOOD            | 149         | 1195        | 2220                                    |
|              |          | LESIONAL-SKIN          | 57          | 15          | 295                                     |
|              |          | NORMAL-SKIN            | 53          | 19          | 350                                     |
| Dixon        | 17873877 | UNINVOLVED-SKIN        | 53          | 12          | 160                                     |
|              |          | LCLS                   | 400         | 634         | 6735                                    |
| Fairfax 2012 | 22446964 | LCLS                   | 400         | 634         | 6735                                    |
|              |          | BCELLS                 | 283         | 236         | 1723                                    |
| Fairfax 2014 | 24604202 | MONOCYTES              | 283         | 549         | 4051                                    |
|              |          | MONOCYTES-IFN          | 367         | 2048        | 21366                                   |
|              |          | MONOCYTES-LPS2         | 261         | 686         | 4658                                    |
|              |          | MONOCYTES-LPS24        | 322         | 1412        | 10740                                   |
|              |          | MONOCYTES-NAIVE        | 414         | 2024        | 24676                                   |
| Fehrmann     | 21829388 | WHOLE-BLOOD            | 1469        | 2944        | 23614                                   |
| Ferraro      | 24610777 | Tconv                  | 65          | 26          | 118                                     |
|              |          | Tregs                  | 65          | 24          | 105                                     |
| Franco       | 23878721 | WHOLE-BLOOD-Influenza  | 247         | 65          | 329                                     |
| Lappalainen  | 24037378 | LCLS                   | 373         | 3525        | 1397237                                 |
| Grundberg    | 22941192 | LCLS                   | 856         | 1550        | 68025                                   |
|              |          | SKIN                   | 856         | 879         | 31390                                   |
|              |          | FIBROBLASTS            | 272         | 3910        | 368252                                  |
| GTEx         | 25954001 | LCLS                   | 114         | 1062        | 88242                                   |
|              |          | LUNG                   | 278         | 3148        | 335019                                  |

|            |              |                              |      |          |      |         |
|------------|--------------|------------------------------|------|----------|------|---------|
|            |              | SKIN                         | 302  | Table E2 | 4026 | 613093  |
|            |              | SPLEEN                       | 89   |          | 926  | 74864   |
|            |              | WHOLE-BLOOD                  | 338  |          | 3331 | 343913  |
| Hao        | 23209423     | LUNG                         | 1111 |          | 4177 | 6339    |
| Huang      | 25951796     | LCLs                         | 368  |          | 2196 | 3091    |
|            |              | PBMCs                        | 240  |          | 1939 | 2617    |
|            |              | SKIN                         | 110  |          | 384  | 453     |
| Jansen     | Under Review | WHOLE-BLOOD                  | 4896 |          | 4377 | 7460    |
| Kasela     | 28248954     | CD4TCELLS                    | 293  |          | 1256 | 121508  |
|            |              | CD8TCELLS                    | 293  |          | 947  | 83337   |
| Kim        | 25327457     | MONOCYTES-Baseline           | 137  |          | 681  | 5669    |
|            |              | MONOCYTES-Differential       | 137  |          | 62   | 377     |
|            |              | MONOCYTES-LPS                | 137  |          | 554  | 4802    |
| Kukurba    | 27197214     | WHOLE-BLOOD                  | 922  |          | 90   | 8333    |
| Lee        | 24604203     | DENDRITIC-Baseline           | 528  |          | 82   | 82      |
|            |              | DENDRITIC-Flu                | 342  |          | 105  | 105     |
|            |              | DENDRITIC-Flu-delta          | 342  |          | 44   | 44      |
|            |              | DENDRITIC-IFN $\beta$        | 284  |          | 86   | 86      |
|            |              | DENDRITIC-IFN $\beta$ -delta | 284  |          | 23   | 24      |
|            |              | DENDRITIC-LPS                | 356  |          | 96   | 96      |
|            |              | DENDRITIC-LPS-delta          | 356  |          | 31   | 31      |
| LloydJones | 28065468     | WHOLE-BLOOD                  | 2765 |          | 5669 | 1373201 |
| Luo        | 26102239     | SMALL-AIRWAYS                | 105  |          | 152  | 174     |
| Murphy     | 20833654     | CD4-TCELLS                   | 200  |          | 294  | 986     |
| Naranbhai  | 26151758     | NEUTROPHILS                  | 101  |          | 493  | 547     |
| Nedelec    | 27768889     | MACROPHAGES-baseline         | 95   |          | 451  | 451     |
|            |              | MACROPHAGES-baseline-asQTL   | 95   |          | 634  | 951     |
|            |              | MACROPHAGES-listeria         | 95   |          | 422  | 422     |
|            |              | MACROPHAGES-listeria-asQTL   | 95   |          | 557  | 827     |
|            |              | MACROPHAGES-listeria-reQTL   | 95   |          | 93   | 93      |
|            |              | MACROPHAGES-salmonella       | 95   |          | 433  | 434     |
|            |              | MACROPHAGES-salmonella-asQTL | 95   |          | 487  | 741     |
|            |              | MACROPHAGES-salmonella-reQTL | 95   |          | 199  | 199     |
| Peters     | 27015630     | BCELLS                       | 80   |          | 66   | 318     |
|            |              | CD4-TCELLS                   | 121  |          | 396  | 2187    |
|            |              | CD8-TCELLS                   | 108  |          | 277  | 1484    |
|            |              | MONOCYTES                    | 124  |          | 564  | 3254    |
|            |              | NEUTROPHILS                  | 121  |          | 341  | 1766    |

|            |          |                                 |      |          |         |     |
|------------|----------|---------------------------------|------|----------|---------|-----|
| Quach      | 27768888 | MONOCYTES-baseline              | 100  | Table E2 | 467     | 469 |
|            |          | MONOCYTES-IAV                   | 100  |          | 366     | 366 |
|            |          | MONOCYTES-LPS                   | 100  |          | 464     | 465 |
|            |          | MONOCYTES-Pam3CSK4              | 100  |          | 536     | 537 |
|            |          | MONOCYTES-R848                  | 100  |          | 478     | 479 |
| Raj        | 24786080 | CD4-TCELLS                      | 407  | 1898     | 150019  |     |
|            |          | MONOCYTES                       | 401  | 2494     | 196870  |     |
| Walsh      | 27140173 | WHOLE-BLOOD                     | 377  | 3777     | 546913  |     |
| Westra     | 24013639 | WHOLE-BLOOD                     | 5311 | 4285     | 343167  |     |
| Yao        | 28285768 | WHOLEBLOOD                      | 5257 | 1681     | 93834   |     |
| Ye         | 25214635 | CD4-TCELLS-48h328               | 348  | 51       | 51      |     |
|            |          | CD4-TCELLS-48hTh17              | 348  | 45       | 45      |     |
|            |          | CD4-TCELLS-4h328                | 348  | 24       | 24      |     |
|            |          | CD4-TCELLS-4hIFNb               | 348  | 27       | 27      |     |
|            |          | CD4-TCELLS-UNST                 | 348  | 19       | 19      |     |
|            |          | MONOCYTES                       | 1490 | 2322     | 31353   |     |
| Zeller     | 20502693 | MONOCYTES                       | 1490 | 2322     | 31353   |     |
| Zhernakova | 27918533 | WHOLEBLOOD-exon-primary         | 2116 | 15028    | 88928   |     |
|            |          | WHOLEBLOOD-exonratio-primary    | 2116 | 6064     | 20222   |     |
|            |          | WHOLEBLOOD-gene-contextspecific | 2116 | 14670    | 27186   |     |
|            |          | WHOLEBLOOD-gene-primary         | 2116 | 15158    | 3669632 |     |
|            |          | WHOLEBLOOD-polyAratio-primary   | 2116 | 1286     | 1843    |     |

---

**Table E3. eQTL included in the gene based test for each of the 30 genes identified in the discovery study.**

Table E3

| Locus | Gene                 | eQTLs included in gene-based test                                                                                                                        |
|-------|----------------------|----------------------------------------------------------------------------------------------------------------------------------------------------------|
| 1     | <i>CASZ1</i>         | rs12045923 rs284296                                                                                                                                      |
| 2     | <i>OR10J5</i>        | rs2427837 rs2494260 rs6699459                                                                                                                            |
| 3     | <i>RP11-534L20.5</i> | rs1117858 rs17433909 rs2297546 rs2336941 rs2987936 rs35785716 rs41299005 rs61816859 rs6666087 rs74882519 rs7538261 rs874718                              |
| 4     | <i>FOSL2</i>         | rs7562                                                                                                                                                   |
| 5     | <i>RBM15B</i>        | rs73078636                                                                                                                                               |
| 5     | <i>VPRBP</i>         | rs73078636                                                                                                                                               |
| 6     | <i>TICAM2</i>        | rs17137937 rs2546480 rs256938                                                                                                                            |
| 7     | <i>NUP43</i>         | rs112165893 rs117067995 rs12523685 rs13205080 rs139394852 rs17733403 rs60328093 rs2151910 rs2281436 rs237004 rs2789503 rs4870058 rs4870139 rs62439806 rs |
| 8     | <i>IPCEF1</i>        | rs12528985 rs1406055 rs7759388 rs9397706                                                                                                                 |
| 9     | <i>AC004893.11</i>   | rs4236540                                                                                                                                                |
| 10    | <i>ABO</i>           | rs10901244 rs12379977 rs12683493 rs176694 rs28645493 rs3094377 rs35664240 rs4962050 rs550057 rs623361 rs62576042 rs626035 rs9411463 rs9411490            |
| 11    | <i>PTPLA</i>         | rs17141430 rs7092926 rs7094705 rs78704091                                                                                                                |
| 11    | <i>TMEM236</i>       | rs45607131 rs55999004 rs7092926                                                                                                                          |
| 12    | <i>PRR5L</i>         | rs10836545 rs1123347 rs12270539 rs12785381 rs429034 rs7925585                                                                                            |
| 13    | <i>NSMCE1</i>        | rs4523932 rs9788909                                                                                                                                      |
| 14    | <i>SPNS1</i>         | rs112918513 rs11569775 rs11643913 rs12448482 rs139456978 rs151230 rs2726040 rs62035317 rs67479058 rs7201546 rs7498329 rs7499778 rs75556002 rs8045689 rs8 |
| 14    | <i>APOBR</i>         | rs151233 rs27741                                                                                                                                         |
| 14    | <i>IL27</i>          | rs231970 rs7191548                                                                                                                                       |
| 14    | <i>SULT1A1</i>       | rs11540497 rs12935321 rs79476281 rs231970 rs4788115 rs4788119 rs75227850 rs75539558                                                                      |
| 14    | <i>RP11-264B17.4</i> | rs12448482 rs67479058 rs8045689                                                                                                                          |
| 14    | <i>LAT</i>           | rs4788115 rs6565261 rs8045689                                                                                                                            |
| 14    | <i>ATXN2L</i>        | rs8056890                                                                                                                                                |
| 14    | <i>RP11-24N18.1</i>  | rs8056890                                                                                                                                                |
| 15    | <i>MYO1C</i>         | rs147003567 rs4790152 rs56157500 rs59343110                                                                                                              |
| 16    | <i>CTD-2369P2.8</i>  | rs10411056 rs1799969 rs2017213 rs2358581 rs2633973 rs281437 rs28378712 rs3177696 rs62130661 rs77123125 rs78064630 rs79337061                             |
| 16    | <i>ICAM1</i>         | rs10411056 rs1799969 rs2017213 rs2358581 rs2633973 rs281437 rs28378712 rs3177696 rs62130661 rs77123125 rs78064630 rs79337061                             |
| 16    | <i>ICAM4</i>         | rs10411056 rs1799969 rs2017213 rs2358581 rs2633973 rs281437 rs28378712 rs3177696 rs62130661 rs7252450 rs77123125 rs78064630                              |
| 17    | <i>FPR1</i>          | rs117223215 rs12461801 rs16983230 rs17661285 rs17803207 rs1868943 rs62106945 rs6509571 rs7253284 rs7254019 rs73056872 rs79956121 rs8104640 rs8110040     |
| 18    | <i>NCF4</i>          | rs2072710 rs4821544 rs4821549 rs5756363 rs5756391                                                                                                        |
| 18    | <i>PVALB</i>         | rs1015775 rs4820250 rs4821544 rs730483 rs74971025                                                                                                        |

Table E3

.6918774|rs6922028|rs7762285|rs78765468|rs79782857|rs9379347|rs6909158|rs9942443

.056259

**Table E4. Association results for each eQTL included in the gene-based test of each of the 30 genes identified in the discovery analysis.**

| Gene         | EUGENE gene-based P-value | Single-SNP association results with allergic disease in the adjusted GWAS |             |               |              |                         |            | Single-SNP association results with gene expression in the respective published eQTL study * |                                            |           |               |           |  |
|--------------|---------------------------|---------------------------------------------------------------------------|-------------|---------------|--------------|-------------------------|------------|----------------------------------------------------------------------------------------------|--------------------------------------------|-----------|---------------|-----------|--|
|              |                           | Proxy tested                                                              | P-value     | Effect allele | Other allele | Effect allele frequency | Beta       | eQTL                                                                                         | eQTL study and tissue                      | P-value   | Effect allele | Effect    |  |
| ABO          | 1.74E-07                  | rs550057                                                                  | 2.77E-07    | T             | C            | 0.2806                  | 0.0294     | rs550057                                                                                     | Zhernakova_WHOLEBLOOD-gene-primary         | 6.05E-142 | T             | -25.3655  |  |
| ABO          | 1.74E-07                  | rs550057                                                                  | 2.77E-07    | T             | C            | 0.2806                  | 0.0294     | rs550057                                                                                     | Zhernakova_WHOLEBLOOD-gene-contextspecific | 6.05E-142 | T             | -25.3655  |  |
| ABO          | 1.74E-07                  | rs550057                                                                  | 2.77E-07    | T             | C            | 0.2806                  | 0.0294     | rs550057                                                                                     | Zhernakova_WHOLEBLOOD-exon-primary         | 6.54E-133 | T             | -24.5331  |  |
| ABO          | 1.74E-07                  | rs550057                                                                  | 2.77E-07    | T             | C            | 0.2806                  | 0.0294     | rs550057                                                                                     | Zhernakova_WHOLEBLOOD-exonratio-primary    | 1.53E-29  | T             | -11.2868  |  |
| ABO          | 1.74E-07                  | rs550057                                                                  | 2.77E-07    | T             | C            | 0.2806                  | 0.0294     | rs550057                                                                                     | Zhernakova_WHOLEBLOOD-exon-primary         | 1.04E-27  | T             | -10.9092  |  |
| ABO          | 1.74E-07                  | rs550057                                                                  | 2.77E-07    | T             | C            | 0.2806                  | 0.0294     | rs550057                                                                                     | Zhernakova_WHOLEBLOOD-exon-primary         | 8.92E-27  | T             | -10.712   |  |
| ABO          | 1.74E-07                  | rs550057                                                                  | 2.77E-07    | T             | C            | 0.2806                  | 0.0294     | rs550057                                                                                     | Zhernakova_WHOLEBLOOD-exon-primary         | 4.48E-26  | T             | -10.5617  |  |
| ABO          | 1.74E-07                  | rs550057                                                                  | 2.77E-07    | T             | C            | 0.2806                  | 0.0294     | rs550057                                                                                     | Zhernakova_WHOLEBLOOD-exonratio-primary    | 8.08E-24  | T             | -10.0626  |  |
| ABO          | 1.74E-07                  | rs550057                                                                  | 2.77E-07    | T             | C            | 0.2806                  | 0.0294     | rs550057                                                                                     | Zhernakova_WHOLEBLOOD-exonratio-primary    | 1.85E-23  | T             | -9.98077  |  |
| ABO          | 1.74E-07                  | rs550057                                                                  | 2.77E-07    | T             | C            | 0.2806                  | 0.0294     | rs550057                                                                                     | Yao_WHOLEBLOOD                             | 1.28E-11  | C             | 0.0253396 |  |
| ABO          | 1.74E-07                  | rs550057                                                                  | 2.77E-07    | T             | C            | 0.2806                  | 0.0294     | rs550057                                                                                     | GTE_WHOLEBLOOD                             | 3.45E-10  | T             | -0.53797  |  |
| ABO          | 1.74E-07                  | rs176694                                                                  | 1.15E-05    | T             | G            | 0.8895                  | -0.0376    | rs176694                                                                                     | Zhernakova_WHOLEBLOOD-gene-primary         | 8.37E-25  | G             | -10.2834  |  |
| ABO          | 1.74E-07                  | rs28645493                                                                | 0.000417512 | C             | G            | 0.9031                  | -0.0328    | rs28645493                                                                                   | Zhernakova_WHOLEBLOOD-gene-primary         | 8.86E-32  | G             | -11.7307  |  |
| ABO          | 1.74E-07                  | rs4962050                                                                 | 0.00159826  | C             | G            | 0.3078                  | -0.0180    | rs4962050                                                                                    | Zhernakova_WHOLEBLOOD-gene-primary         | 4.50E-25  | C             | 10.343    |  |
| ABO          | 1.74E-07                  | rs12683493                                                                | 0.00756848  | T             | C            | 0.1990                  | -0.0166    | rs12683493                                                                                   | Zhernakova_WHOLEBLOOD-gene-primary         | 1.39E-11  | T             | 6.75868   |  |
| ABO          | 1.74E-07                  | rs9411490                                                                 | 0.0892349   | A             | G            | 0.8214                  | 0.0109     | rs9411490                                                                                    | Zhernakova_WHOLEBLOOD-gene-contextspecific | 2.57E-16  | G             | -8.19194  |  |
| ABO          | 1.74E-07                  | rs12379977                                                                | 0.265942    | T             | C            | 0.3299                  | -0.0061    | rs12379977                                                                                   | Zhernakova_WHOLEBLOOD-gene-primary         | 2.72E-18  | T             | 8.72254   |  |
| ABO          | 1.74E-07                  | rs10901244                                                                | 0.364805    | T             | C            | 0.4184                  | -0.0046    | rs10901244                                                                                   | Hao_LUNG                                   | 0         | T             | -8.47     |  |
| ABO          | 1.74E-07                  | rs626035                                                                  | 0.443795    | T             | G            | 0.8027                  | 0.0048     | rs626035                                                                                     | Zhernakova_WHOLEBLOOD-gene-primary         | 1.91E-17  | G             | 8.49909   |  |
| ABO          | 1.74E-07                  | rs9411463                                                                 | 0.492101    | T             | C            | 0.0867                  | -0.0069    | rs9411463                                                                                    | Hao_LUNG                                   | 0         | C             | -11.7     |  |
| ABO          | 1.74E-07                  | rs9411463                                                                 | 0.492101    | T             | C            | 0.0867                  | -0.0069    | rs9411463                                                                                    | Zhernakova_WHOLEBLOOD-gene-primary         | 2.39E-73  | T             | 18.1159   |  |
| ABO          | 1.74E-07                  | rs9411463                                                                 | 0.492101    | T             | C            | 0.0867                  | -0.0069    | rs9411463                                                                                    | GTE_SKIN                                   | 6.54E-20  | T             | 1.12925   |  |
| ABO          | 1.74E-07                  | rs9411463                                                                 | 0.492101    | T             | C            | 0.0867                  | -0.0069    | rs9411463                                                                                    | GTE_SKIN                                   | 1.00E-17  | T             | 1.38294   |  |
| ABO          | 1.74E-07                  | rs9411463                                                                 | 0.492101    | T             | C            | 0.0867                  | -0.0069    | rs9411463                                                                                    | GTE_LUNG                                   | 7.67E-12  | T             | 0.626984  |  |
| ABO          | 1.74E-07                  | rs35664240                                                                | 0.592636    | T             | C            | 0.1105                  | 0.0052     | rs35664240                                                                                   | Zhernakova_WHOLEBLOOD-gene-primary         | 2.39E-12  | T             | -7.00975  |  |
| ABO          | 1.74E-07                  | rs62576042                                                                | 0.625485    | T             | C            | 0.1701                  | 0.0037     | rs62576042                                                                                   | Zhernakova_WHOLEBLOOD-gene-primary         | 2.18E-21  | T             | 9.49601   |  |
| ABO          | 1.74E-07                  | rs623361                                                                  | 0.635394    | A             | G            | 0.3350                  | 0.0028     | rs623361                                                                                     | Zhernakova_WHOLEBLOOD-gene-primary         | 4.77E-11  | A             | 6.57812   |  |
| ABO          | 1.74E-07                  | rs3094377                                                                 | 0.875632    | T             | C            | 0.0340                  | -0.0021    | rs3094377                                                                                    | Zhernakova_WHOLEBLOOD-gene-primary         | 1.39E-18  | T             | -8.7985   |  |
| AC004893.11  | 8.10E-07                  | rs4236540                                                                 | 8.10E-07    | T             | G            | 0.7143                  | -0.0282    | rs4236540                                                                                    | Zhernakova_WHOLEBLOOD-exon-primary         | 3.67E-15  | G             | 7.86572   |  |
| AC004893.11  | 8.10E-07                  | rs4236540                                                                 | 8.10E-07    | T             | G            | 0.7143                  | -0.0282    | rs4236540                                                                                    | Zhernakova_WHOLEBLOOD-gene-primary         | 1.16E-13  | G             | 7.42145   |  |
| AC004893.11  | 8.10E-07                  | rs4236540                                                                 | 8.10E-07    | T             | G            | 0.7143                  | -0.0282    | rs4236540                                                                                    | Zhernakova_WHOLEBLOOD-gene-contextspecific | 1.16E-13  | G             | 7.42145   |  |
| APOBR        | 1.58E-08                  | rs151233                                                                  | 3.22E-06    | T             | C            | 0.1327                  | 0.0385     | rs151233                                                                                     | Zhernakova_WHOLEBLOOD-exon-primary         | 2.31E-12  | T             | -7.0144   |  |
| APOBR        | 1.58E-08                  | rs151233                                                                  | 3.22E-06    | T             | C            | 0.1327                  | 0.0385     | rs151233                                                                                     | Zhernakova_WHOLEBLOOD-exon-primary         | 1.47E-11  | T             | -6.75084  |  |
| APOBR        | 1.58E-08                  | rs151233                                                                  | 3.22E-06    | T             | C            | 0.1327                  | 0.0385     | rs151233                                                                                     | Zhernakova_WHOLEBLOOD-gene-contextspecific | 9.17E-10  | T             | -6.12304  |  |
| APOBR        | 1.58E-08                  | rs151233                                                                  | 3.22E-06    | T             | C            | 0.1327                  | 0.0385     | rs151233                                                                                     | Zhernakova_WHOLEBLOOD-gene-primary         | 9.17E-10  | T             | -6.12304  |  |
| APOBR        | 1.58E-08                  | rs27741                                                                   | 4.42E-06    | A             | G            | 0.3622                  | -0.0239    | rs27741                                                                                      | LloydJones_WHOLEBLOOD                      | 9.90E-30  | A             | 0.313874  |  |
| ATXN2L       | 1.71E-06                  | rs8056890                                                                 | 1.71E-06    | A             | G            | 0.2959                  | -0.0254    | rs8056890                                                                                    | Zhernakova_WHOLEBLOOD-gene-contextspecific | 2.10E-23  | A             | -9.96813  |  |
| ATXN2L       | 1.71E-06                  | rs8056890                                                                 | 1.71E-06    | A             | G            | 0.2959                  | -0.0254    | rs8056890                                                                                    | Zhernakova_WHOLEBLOOD-gene-primary         | 2.10E-23  | A             | -9.96813  |  |
| ATXN2L       | 1.71E-06                  | rs8056890                                                                 | 1.71E-06    | A             | G            | 0.2959                  | -0.0254    | rs8056890                                                                                    | Zhernakova_WHOLEBLOOD-exon-primary         | 3.78E-22  | A             | -9.67673  |  |
| ATXN2L       | 1.71E-06                  | rs8056890                                                                 | 1.71E-06    | A             | G            | 0.2959                  | -0.0254    | rs8056890                                                                                    | Zhernakova_WHOLEBLOOD-gene-primary         | 1.27E-20  | A             | -9.31092  |  |
| ATXN2L       | 1.71E-06                  | rs8056890                                                                 | 1.71E-06    | A             | G            | 0.2959                  | -0.0254    | rs8056890                                                                                    | Zhernakova_WHOLEBLOOD-gene-contextspecific | 1.27E-20  | A             | -9.31092  |  |
| ATXN2L       | 1.71E-06                  | rs8056890                                                                 | 1.71E-06    | A             | G            | 0.2959                  | -0.0254    | rs8056890                                                                                    | Zhernakova_WHOLEBLOOD-exon-primary         | 4.79E-14  | A             | -7.53739  |  |
| CASZ1        | 1.93E-06                  | rs12045923                                                                | 4.87E-07    | T             | C            | 0.6497                  | 0.0288     | rs12045923                                                                                   | Kim_MONOCYTES-LPS                          | 7.63E-12  | NA            | -9        |  |
| CASZ1        | 1.93E-06                  | rs12045923                                                                | 4.87E-07    | T             | C            | 0.6497                  | 0.0288     | rs12045923                                                                                   | Kim_MONOCYTES-Baseline                     | 3.72E-11  | NA            | -9        |  |
| CASZ1        | 1.93E-06                  | rs284296                                                                  | 0.29118     | A             | G            | 0.7823                  | -0.0070    | rs284296                                                                                     | LloydJones_WHOLEBLOOD                      | 7.10E-18  | G             | -0.282965 |  |
| CASZ1        | 1.93E-06                  | rs284296                                                                  | 0.29118     | A             | G            | 0.7823                  | -0.0070    | rs284296                                                                                     | Zhernakova_WHOLEBLOOD-exonratio-primary    | 3.41E-10  | G             | 6.27892   |  |
| CTD-2369P2.8 | 5.10E-07                  | rs1799969                                                                 | 1.76E-05    | A             | G            | 0.1480                  | 0.0355     | rs1799969                                                                                    | Zhernakova_WHOLEBLOOD-gene-primary         | 2.10E-14  | A             | -7.64456  |  |
| CTD-2369P2.8 | 5.10E-07                  | rs78064630                                                                | 0.00135441  | A             | G            | 0.0765                  | Page010314 | rs78064630                                                                                   | Zhernakova_WHOLEBLOOD-gene-primary         | 2.46E-12  | A             | 7.00583   |  |

|              |          |             |             |   |   |        |         |             |                                            |           |    |           |
|--------------|----------|-------------|-------------|---|---|--------|---------|-------------|--------------------------------------------|-----------|----|-----------|
| CTD-2369P2.8 | 5.10E-07 | rs281437    | 0.00184684  | T | C | 0.2670 | -0.0178 | rs281437    | Zhernakova_WHOLEBLOOD-exon-primary         | 2.96E-190 | T  | 29.421    |
| CTD-2369P2.8 | 5.10E-07 | rs281437    | 0.00184684  | T | C | 0.2670 | -0.0178 | rs281437    | Zhernakova_WHOLEBLOOD-gene-contextspecific | 1.17E-181 | T  | 28.7411   |
| CTD-2369P2.8 | 5.10E-07 | rs281437    | 0.00184684  | T | C | 0.2670 | -0.0178 | rs281437    | Zhernakova_WHOLEBLOOD-gene-primary         | 1.17E-181 | T  | 28.7411   |
| CTD-2369P2.8 | 5.10E-07 | rs281437    | 0.00184684  | T | C | 0.2670 | -0.0178 | rs281437    | GTE_WHOLEBLOOD                             | 4.51E-21  | T  | 0.410584  |
| CTD-2369P2.8 | 5.10E-07 | rs2633973   | 0.00276867  | T | C | 0.6599 | -0.0168 | rs2633973   | Zhernakova_WHOLEBLOOD-gene-primary         | 8.83E-10  | C  | -6.12904  |
| CTD-2369P2.8 | 5.10E-07 | rs28378712  | 0.00678241  | T | G | 0.6803 | -0.0152 | rs28378712  | Zhernakova_WHOLEBLOOD-gene-primary         | 3.55E-19  | G  | -8.94992  |
| CTD-2369P2.8 | 5.10E-07 | rs2017213   | 0.0075857   | A | T | 0.3810 | -0.0139 | rs2017213   | Zhernakova_WHOLEBLOOD-gene-primary         | 6.90E-12  | A  | 6.85981   |
| CTD-2369P2.8 | 5.10E-07 | rs10411056  | 0.0197799   | A | C | 0.9354 | 0.0226  | rs10411056  | Zhernakova_WHOLEBLOOD-gene-primary         | 2.83E-15  | C  | 7.89849   |
| CTD-2369P2.8 | 5.10E-07 | rs79337061  | 0.348043    | T | C | 0.0765 | -0.0091 | rs79337061  | Zhernakova_WHOLEBLOOD-gene-primary         | 3.58E-15  | T  | 7.86884   |
| CTD-2369P2.8 | 5.10E-07 | rs2358581   | 0.352461    | T | G | 0.2483 | -0.0056 | rs2358581   | Zhernakova_WHOLEBLOOD-gene-primary         | 1.63E-27  | T  | -10.8681  |
| CTD-2369P2.8 | 5.10E-07 | rs62130661  | 0.464875    | C | G | 0.8010 | 0.0047  | rs62130661  | Zhernakova_WHOLEBLOOD-gene-primary         | 6.30E-30  | G  | 11.3644   |
| CTD-2369P2.8 | 5.10E-07 | rs77123125  | 0.758586    | A | G | 0.1003 | -0.0032 | rs77123125  | Zhernakova_WHOLEBLOOD-gene-primary         | 7.17E-10  | A  | -6.16239  |
| CTD-2369P2.8 | 5.10E-07 | rs3177696   | 0.908246    | T | C | 0.9201 | -0.0010 | rs3177696   | Zhernakova_WHOLEBLOOD-gene-primary         | 3.44E-15  | C  | 7.874     |
| FOSL2        | 8.76E-07 | rs7562      | 8.76E-07    | T | C | 0.5306 | 0.0251  | rs7562      | Zhernakova_WHOLEBLOOD-exonratio-primary    | 2.60E-29  | C  | -11.2398  |
| FOSL2        | 8.76E-07 | rs7562      | 8.76E-07    | T | C | 0.5306 | 0.0251  | rs7562      | Zhernakova_WHOLEBLOOD-exonratio-primary    | 6.14E-26  | C  | 10.5324   |
| FOSL2        | 8.76E-07 | rs7562      | 8.76E-07    | T | C | 0.5306 | 0.0251  | rs7562      | Walsh_WHOLEBLOOD                           | 1.89E-11  | T  | -0.47246  |
| FOSL2        | 8.76E-07 | rs7562      | 8.76E-07    | T | C | 0.5306 | 0.0251  | rs7562      | Zhernakova_WHOLEBLOOD-exonratio-primary    | 1.41E-09  | C  | 6.05473   |
| FPR1         | 1.49E-08 | rs7254019   | 1.79E-05    | A | G | 0.1395 | 0.0381  | rs7254019   | Zhernakova_WHOLEBLOOD-gene-primary         | 1.45E-10  | A  | -6.41041  |
| FPR1         | 1.49E-08 | rs12461801  | 9.65E-05    | A | G | 0.5969 | -0.0203 | rs12461801  | Zhernakova_WHOLEBLOOD-exon-primary         | 1.83E-150 | G  | -26.1263  |
| FPR1         | 1.49E-08 | rs12461801  | 9.65E-05    | A | G | 0.5969 | -0.0203 | rs12461801  | Zhernakova_WHOLEBLOOD-gene-primary         | 4.30E-132 | G  | -24.4563  |
| FPR1         | 1.49E-08 | rs12461801  | 9.65E-05    | A | G | 0.5969 | -0.0203 | rs12461801  | Zhernakova_WHOLEBLOOD-exon-primary         | 6.10E-121 | G  | -23.3847  |
| FPR1         | 1.49E-08 | rs12461801  | 9.65E-05    | A | G | 0.5969 | -0.0203 | rs12461801  | LloydJones_WHOLEBLOOD                      | 7.10E-80  | G  | -0.532809 |
| FPR1         | 1.49E-08 | rs12461801  | 9.65E-05    | A | G | 0.5969 | -0.0203 | rs12461801  | Zhernakova_WHOLEBLOOD-exon-primary         | 4.02E-45  | G  | -14.096   |
| FPR1         | 1.49E-08 | rs12461801  | 9.65E-05    | A | G | 0.5969 | -0.0203 | rs12461801  | Zhernakova_WHOLEBLOOD-exon-primary         | 3.32E-20  | G  | -9.20782  |
| FPR1         | 1.49E-08 | rs12461801  | 9.65E-05    | A | G | 0.5969 | -0.0203 | rs12461801  | Walsh_WHOLEBLOOD                           | 5.91E-14  | G  | -0.538086 |
| FPR1         | 1.49E-08 | rs6509571   | 0.000191405 | T | C | 0.3520 | -0.0198 | rs6509571   | Westra_WHOLEBLOOD                          | 7.86E-73  | T  | 18.0502   |
| FPR1         | 1.49E-08 | rs6509571   | 0.000191405 | T | C | 0.3520 | -0.0198 | rs6509571   | LloydJones_WHOLEBLOOD                      | 1.60E-38  | T  | 0.373842  |
| FPR1         | 1.49E-08 | rs6509571   | 0.000191405 | T | C | 0.3520 | -0.0198 | rs6509571   | Zhernakova_WHOLEBLOOD-gene-primary         | 3.51E-34  | T  | 12.1901   |
| FPR1         | 1.49E-08 | rs7253284   | 0.000877773 | A | G | 0.3282 | 0.0180  | rs7253284   | Hao_LUNG                                   | 0         | G  | 10.3      |
| FPR1         | 1.49E-08 | rs7253284   | 0.000877773 | A | G | 0.3282 | 0.0180  | rs7253284   | Zhernakova_WHOLEBLOOD-gene-primary         | 5.36E-93  | A  | -20.4556  |
| FPR1         | 1.49E-08 | rs7253284   | 0.000877773 | A | G | 0.3282 | 0.0180  | rs7253284   | Zeller_MONOCYTES                           | 6.54E-92  | NA | -9        |
| FPR1         | 1.49E-08 | rs7253284   | 0.000877773 | A | G | 0.3282 | 0.0180  | rs7253284   | Westra_WHOLEBLOOD                          | 6.06E-90  | A  | -20.11    |
| FPR1         | 1.49E-08 | rs7253284   | 0.000877773 | A | G | 0.3282 | 0.0180  | rs7253284   | LloydJones_WHOLEBLOOD                      | 3.50E-48  | A  | -0.441034 |
| FPR1         | 1.49E-08 | rs7253284   | 0.000877773 | A | G | 0.3282 | 0.0180  | rs7253284   | GTE_WHOLEBLOOD                             | 1.35E-09  | G  | 0.1661    |
| FPR1         | 1.49E-08 | rs62106945  | 0.00554085  | T | C | 0.0884 | 0.0252  | rs62106945  | Zhernakova_WHOLEBLOOD-gene-primary         | 1.73E-11  | T  | -6.7268   |
| FPR1         | 1.49E-08 | rs16983230  | 0.0164076   | T | G | 0.9558 | -0.0316 | rs16983230  | Westra_WHOLEBLOOD                          | 3.93E-10  | G  | -6.25665  |
| FPR1         | 1.49E-08 | rs79956121  | 0.0172967   | T | C | 0.0714 | 0.0277  | rs79956121  | Zhernakova_WHOLEBLOOD-gene-primary         | 2.37E-10  | T  | -6.33492  |
| FPR1         | 1.49E-08 | rs1868943   | 0.0584274   | A | G | 0.0986 | 0.0170  | rs1868943   | Zhernakova_WHOLEBLOOD-gene-primary         | 8.29E-31  | A  | -11.54    |
| FPR1         | 1.49E-08 | rs1868943   | 0.0584274   | A | G | 0.0986 | 0.0170  | rs1868943   | Zhernakova_WHOLEBLOOD-exon-primary         | 1.29E-19  | A  | -9.06152  |
| FPR1         | 1.49E-08 | rs17661285  | 0.0848097   | A | G | 0.3163 | -0.0095 | rs17661285  | Westra_WHOLEBLOOD                          | 3.20E-25  | A  | 10.376    |
| FPR1         | 1.49E-08 | rs17661285  | 0.0848097   | A | G | 0.3163 | -0.0095 | rs17661285  | LloydJones_WHOLEBLOOD                      | 9.60E-13  | A  | 0.211433  |
| FPR1         | 1.49E-08 | rs8110040   | 0.568977    | A | G | 0.0884 | 0.0050  | rs8110040   | Westra_WHOLEBLOOD                          | 5.78E-17  | A  | -8.36968  |
| FPR1         | 1.49E-08 | rs8104640   | 0.573427    | T | C | 0.1207 | 0.0050  | rs8104640   | Westra_WHOLEBLOOD                          | 4.18E-108 | T  | 22.0876   |
| FPR1         | 1.49E-08 | rs8104640   | 0.573427    | T | C | 0.1207 | 0.0050  | rs8104640   | LloydJones_WHOLEBLOOD                      | 1.00E-61  | T  | 0.795929  |
| FPR1         | 1.49E-08 | rs8104640   | 0.573427    | T | C | 0.1207 | 0.0050  | rs8104640   | Walsh_WHOLEBLOOD                           | 4.66E-28  | C  | 1.2629    |
| FPR1         | 1.49E-08 | rs8104640   | 0.573427    | T | C | 0.1207 | 0.0050  | rs8104640   | GTE_FIBROBLASTS                            | 7.55E-18  | T  | 0.748262  |
| FPR1         | 1.49E-08 | rs17803207  | 0.624261    | A | G | 0.1122 | -0.0037 | rs17803207  | Zhernakova_WHOLEBLOOD-exon-primary         | 2.36E-191 | A  | 29.5069   |
| FPR1         | 1.49E-08 | rs17803207  | 0.624261    | A | G | 0.1122 | -0.0037 | rs17803207  | Zhernakova_WHOLEBLOOD-exonratio-primary    | 2.23E-61  | A  | 16.5302   |
| FPR1         | 1.49E-08 | rs17803207  | 0.624261    | A | G | 0.1122 | -0.0037 | rs17803207  | Battle_WHOLEBLOOD-ase                      | 4.72E-53  | NA | -9        |
| FPR1         | 1.49E-08 | rs17803207  | 0.624261    | A | G | 0.1122 | -0.0037 | rs17803207  | Zhernakova_WHOLEBLOOD-exon-primary         | 1.54E-12  | A  | 7.07069   |
| FPR1         | 1.49E-08 | rs117223215 | 0.721224    | T | C | 0.0153 | 0.0055  | rs117223215 | LloydJones_WHOLEBLOOD                      | 3.90E-20  | T  | -0.776936 |
| FPR1         | 1.49E-08 | rs73056872  | 0.919279    | T | G | 0.9133 | -0.0009 | rs73056872  | LloydJones_WHOLEBLOOD                      | 1.20E-15  | G  | -0.406202 |
| ICAM1        | 5.10E-07 | rs1799969   | 1.76E-05    | A | G | 0.1480 | 0.0355  | rs1799969   | Zhernakova_WHOLEBLOOD-gene-primary         | 2.10E-14  | A  | -7.64456  |
| ICAM1        | 5.10E-07 | rs78064630  | 0.00135441  | A | G | 0.0765 | -0.0314 | rs78064630  | Zhernakova_WHOLEBLOOD-gene-primary         | 2.46E-12  | A  | 7.00583   |
| ICAM1        | 5.10E-07 | rs281437    | 0.00184684  | T | C | 0.2670 | -0.0178 | rs281437    | Zhernakova_WHOLEBLOOD-exon-primary         | 2.96E-190 | T  | 29.421    |
| ICAM1        | 5.10E-07 | rs281437    | 0.00184684  | T | C | 0.2670 | -0.0178 | rs281437    | Zhernakova_WHOLEBLOOD-gene-contextspecific | 1.17E-181 | T  | 28.7411   |
| ICAM1        | 5.10E-07 | rs281437    | 0.00184684  | T | C | 0.2670 | -0.0178 | rs281437    | Zhernakova_WHOLEBLOOD-gene-primary         | 1.17E-181 | T  | 28.7411   |



|        |          |            |            |   |   |        |         |            |                                            |           |    |           |
|--------|----------|------------|------------|---|---|--------|---------|------------|--------------------------------------------|-----------|----|-----------|
| ICAM1  | 5.10E-07 | rs281437   | 0.00184684 | T | C | 0.2670 | 0.0178  | rs281437   | Raj_MONOCYTES                              | 4.09E-94  | NA | -9        |
| ICAM1  | 5.10E-07 | rs281437   | 0.00184684 | T | C | 0.2670 | -0.0178 | rs281437   | Battle_WHOLEBLOOD                          | 3.16E-44  | NA | -9        |
| ICAM1  | 5.10E-07 | rs281437   | 0.00184684 | T | C | 0.2670 | -0.0178 | rs281437   | Zhernakova_WHOLEBLOOD-gene-primary         | 3.14E-30  | T  | 11.4249   |
| ICAM1  | 5.10E-07 | rs281437   | 0.00184684 | T | C | 0.2670 | -0.0178 | rs281437   | Zhernakova_WHOLEBLOOD-exon-primary         | 1.62E-28  | T  | 11.0773   |
| ICAM1  | 5.10E-07 | rs281437   | 0.00184684 | T | C | 0.2670 | -0.0178 | rs281437   | Zhernakova_WHOLEBLOOD-exon-primary         | 3.29E-26  | T  | 10.5908   |
| ICAM1  | 5.10E-07 | rs281437   | 0.00184684 | T | C | 0.2670 | -0.0178 | rs281437   | Zhernakova_WHOLEBLOOD-exon-primary         | 7.79E-26  | T  | 10.5098   |
| ICAM1  | 5.10E-07 | rs281437   | 0.00184684 | T | C | 0.2670 | -0.0178 | rs281437   | Zhernakova_WHOLEBLOOD-gene-primary         | 2.07E-21  | T  | 9.50136   |
| ICAM1  | 5.10E-07 | rs281437   | 0.00184684 | T | C | 0.2670 | -0.0178 | rs281437   | Zhernakova_WHOLEBLOOD-exon-primary         | 1.46E-13  | T  | 7.39063   |
| ICAM1  | 5.10E-07 | rs2633973  | 0.00276867 | T | C | 0.6599 | -0.0168 | rs2633973  | Zhernakova_WHOLEBLOOD-gene-primary         | 8.83E-10  | C  | -6.12904  |
| ICAM1  | 5.10E-07 | rs28378712 | 0.00678241 | T | G | 0.6803 | -0.0152 | rs28378712 | Zhernakova_WHOLEBLOOD-gene-primary         | 3.55E-19  | G  | -8.94992  |
| ICAM1  | 5.10E-07 | rs2017213  | 0.0075857  | A | T | 0.3810 | -0.0139 | rs2017213  | Zhernakova_WHOLEBLOOD-gene-primary         | 6.90E-12  | A  | 6.85981   |
| ICAM1  | 5.10E-07 | rs10411056 | 0.0197799  | A | C | 0.9354 | 0.0226  | rs10411056 | Zhernakova_WHOLEBLOOD-gene-primary         | 2.83E-15  | C  | 7.89849   |
| ICAM1  | 5.10E-07 | rs79337061 | 0.348043   | T | C | 0.0765 | -0.0091 | rs79337061 | Zhernakova_WHOLEBLOOD-gene-primary         | 3.58E-15  | T  | 7.86884   |
| ICAM1  | 5.10E-07 | rs2358581  | 0.352461   | T | G | 0.2483 | -0.0056 | rs2358581  | Zhernakova_WHOLEBLOOD-gene-primary         | 1.63E-27  | T  | -10.8681  |
| ICAM1  | 5.10E-07 | rs62130661 | 0.464875   | C | G | 0.8010 | 0.0047  | rs62130661 | Zhernakova_WHOLEBLOOD-gene-primary         | 6.30E-30  | G  | 11.3644   |
| ICAM1  | 5.10E-07 | rs77123125 | 0.758586   | A | G | 0.1003 | -0.0032 | rs77123125 | Zhernakova_WHOLEBLOOD-gene-primary         | 7.17E-10  | A  | -6.16239  |
| ICAM1  | 5.10E-07 | rs3177696  | 0.908246   | T | C | 0.9201 | -0.0010 | rs3177696  | Zhernakova_WHOLEBLOOD-gene-primary         | 3.44E-15  | C  | 7.874     |
| ICAM4  | 6.08E-07 | rs1799969  | 1.76E-05   | A | G | 0.1480 | 0.0355  | rs1799969  | Zhernakova_WHOLEBLOOD-gene-primary         | 2.10E-14  | A  | -7.64456  |
| ICAM4  | 6.08E-07 | rs1799969  | 1.76E-05   | A | G | 0.1480 | 0.0355  | rs1799969  | Westra_WHOLEBLOOD                          | 8.91E-11  | A  | -6.48453  |
| ICAM4  | 6.08E-07 | rs78064630 | 0.00135441 | A | G | 0.0765 | -0.0314 | rs78064630 | Zhernakova_WHOLEBLOOD-gene-primary         | 2.46E-12  | A  | 7.00583   |
| ICAM4  | 6.08E-07 | rs281437   | 0.00184684 | T | C | 0.2670 | -0.0178 | rs281437   | Battle_WHOLEBLOOD                          | 1.06E-216 | NA | -9        |
| ICAM4  | 6.08E-07 | rs281437   | 0.00184684 | T | C | 0.2670 | -0.0178 | rs281437   | Zhernakova_WHOLEBLOOD-exon-primary         | 2.96E-190 | T  | 29.421    |
| ICAM4  | 6.08E-07 | rs281437   | 0.00184684 | T | C | 0.2670 | -0.0178 | rs281437   | Zhernakova_WHOLEBLOOD-gene-contextspecific | 1.17E-181 | T  | 28.7411   |
| ICAM4  | 6.08E-07 | rs281437   | 0.00184684 | T | C | 0.2670 | -0.0178 | rs281437   | Zhernakova_WHOLEBLOOD-gene-primary         | 1.17E-181 | T  | 28.7411   |
| ICAM4  | 6.08E-07 | rs281437   | 0.00184684 | T | C | 0.2670 | -0.0178 | rs281437   | Fairfax_MONOCYTES-NAIVE                    | 2.35E-129 | NA | -9        |
| ICAM4  | 6.08E-07 | rs281437   | 0.00184684 | T | C | 0.2670 | -0.0178 | rs281437   | Westra_WHOLEBLOOD                          | 2.04E-120 | T  | 23.3333   |
| ICAM4  | 6.08E-07 | rs281437   | 0.00184684 | T | C | 0.2670 | -0.0178 | rs281437   | LloydJones_WHOLEBLOOD                      | 9.10E-100 | T  | 0.663692  |
| ICAM4  | 6.08E-07 | rs281437   | 0.00184684 | T | C | 0.2670 | -0.0178 | rs281437   | Fairfax_MONOCYTES-NAIVE                    | 5.49E-97  | NA | -9        |
| ICAM4  | 6.08E-07 | rs281437   | 0.00184684 | T | C | 0.2670 | -0.0178 | rs281437   | Fairfax_MONOCYTES                          | 2.77E-92  | NA | -9        |
| ICAM4  | 6.08E-07 | rs281437   | 0.00184684 | T | C | 0.2670 | -0.0178 | rs281437   | Fairfax_MONOCYTES                          | 7.46E-62  | NA | -9        |
| ICAM4  | 6.08E-07 | rs281437   | 0.00184684 | T | C | 0.2670 | -0.0178 | rs281437   | Westra_WHOLEBLOOD                          | 8.86E-54  | T  | 15.4397   |
| ICAM4  | 6.08E-07 | rs281437   | 0.00184684 | T | C | 0.2670 | -0.0178 | rs281437   | LloydJones_WHOLEBLOOD                      | 6.30E-38  | T  | 0.400262  |
| ICAM4  | 6.08E-07 | rs281437   | 0.00184684 | T | C | 0.2670 | -0.0178 | rs281437   | Walsh_WHOLEBLOOD                           | 1.28E-37  | C  | -0.967882 |
| ICAM4  | 6.08E-07 | rs281437   | 0.00184684 | T | C | 0.2670 | -0.0178 | rs281437   | GTE_WHOLEBLOOD                             | 1.83E-34  | T  | 0.619615  |
| ICAM4  | 6.08E-07 | rs281437   | 0.00184684 | T | C | 0.2670 | -0.0178 | rs281437   | Grundberg_LCLS                             | 1.43E-16  | T  | -0.100867 |
| ICAM4  | 6.08E-07 | rs281437   | 0.00184684 | T | C | 0.2670 | -0.0178 | rs281437   | Davenport_LEUCOCYTES                       | 4.91E-11  | NA | -9        |
| ICAM4  | 6.08E-07 | rs281437   | 0.00184684 | T | C | 0.2670 | -0.0178 | rs281437   | Yao_WHOLEBLOOD                             | 2.19E-10  | C  | -0.045635 |
| ICAM4  | 6.08E-07 | rs281437   | 0.00184684 | T | C | 0.2670 | -0.0178 | rs281437   | Yao_WHOLEBLOOD                             | 2.19E-10  | C  | -0.045635 |
| ICAM4  | 6.08E-07 | rs2633973  | 0.00276867 | T | C | 0.6599 | -0.0168 | rs2633973  | Zhernakova_WHOLEBLOOD-gene-primary         | 8.83E-10  | C  | -6.12904  |
| ICAM4  | 6.08E-07 | rs28378712 | 0.00678241 | T | G | 0.6803 | -0.0152 | rs28378712 | Zhernakova_WHOLEBLOOD-gene-primary         | 3.55E-19  | G  | -8.94992  |
| ICAM4  | 6.08E-07 | rs2017213  | 0.0075857  | A | T | 0.3810 | -0.0139 | rs2017213  | Zhernakova_WHOLEBLOOD-gene-primary         | 6.90E-12  | A  | 6.85981   |
| ICAM4  | 6.08E-07 | rs10411056 | 0.0197799  | A | C | 0.9354 | 0.0226  | rs10411056 | Zhernakova_WHOLEBLOOD-gene-primary         | 2.83E-15  | C  | 7.89849   |
| ICAM4  | 6.08E-07 | rs10411056 | 0.0197799  | A | C | 0.9354 | 0.0226  | rs10411056 | LloydJones_WHOLEBLOOD                      | 9.30E-12  | C  | 0.359728  |
| ICAM4  | 6.08E-07 | rs2358581  | 0.352461   | T | G | 0.2483 | -0.0056 | rs2358581  | Zhernakova_WHOLEBLOOD-gene-primary         | 1.63E-27  | T  | -10.8681  |
| ICAM4  | 6.08E-07 | rs2358581  | 0.352461   | T | G | 0.2483 | -0.0056 | rs2358581  | LloydJones_WHOLEBLOOD                      | 1.00E-13  | T  | -0.222958 |
| ICAM4  | 6.08E-07 | rs7252450  | 0.397785   | A | C | 0.0782 | -0.0082 | rs7252450  | LloydJones_WHOLEBLOOD                      | 3.40E-15  | A  | 0.413387  |
| ICAM4  | 6.08E-07 | rs7252450  | 0.397785   | A | C | 0.0782 | -0.0082 | rs7252450  | Zhernakova_WHOLEBLOOD-gene-primary         | 1.19E-11  | A  | 6.78206   |
| ICAM4  | 6.08E-07 | rs62130661 | 0.464875   | C | G | 0.8010 | 0.0047  | rs62130661 | Zhernakova_WHOLEBLOOD-gene-primary         | 6.30E-30  | G  | 11.3644   |
| ICAM4  | 6.08E-07 | rs62130661 | 0.464875   | C | G | 0.8010 | 0.0047  | rs62130661 | LloydJones_WHOLEBLOOD                      | 1.90E-16  | G  | 0.285605  |
| ICAM4  | 6.08E-07 | rs77123125 | 0.758586   | A | G | 0.1003 | -0.0032 | rs77123125 | Zhernakova_WHOLEBLOOD-gene-primary         | 7.17E-10  | A  | -6.16239  |
| ICAM4  | 6.08E-07 | rs3177696  | 0.908246   | T | C | 0.9201 | -0.0010 | rs3177696  | Zhernakova_WHOLEBLOOD-gene-primary         | 3.44E-15  | C  | 7.874     |
| ICAM4  | 6.08E-07 | rs3177696  | 0.908246   | T | C | 0.9201 | -0.0010 | rs3177696  | LloydJones_WHOLEBLOOD                      | 1.10E-10  | C  | 0.314191  |
| IL27   | 2.60E-08 | rs231970   | 4.84E-06   | A | G | 0.8827 | -0.0350 | rs231970   | Zhernakova_WHOLEBLOOD-gene-primary         | 4.80E-21  | G  | -9.41324  |
| IL27   | 2.60E-08 | rs7191548  | 1.18E-05   | T | C | 0.6599 | 0.0237  | rs7191548  | Zhernakova_WHOLEBLOOD-gene-primary         | 4.30E-36  | C  | 12.5439   |
| IL27   | 2.60E-08 | rs7191548  | 1.18E-05   | T | C | 0.6599 | 0.0237  | rs7191548  | Zhernakova_WHOLEBLOOD-gene-contextspecific | 4.30E-36  | C  | 12.5439   |
| IL27   | 2.60E-08 | rs7191548  | 1.18E-05   | T | C | 0.6599 | 0.0237  | rs7191548  | Zhernakova_WHOLEBLOOD-exon-primary         | 3.14E-20  | C  | 9.21402   |
| IPCEF1 | 4.33E-07 | rs9397706  | 4.73E-07   | A | G | 0.5272 | 0.0257  | rs9397706  | Zhernakova_WHOLEBLOOD-gene-primary         | 2.74E-13  | G  | 7.30675   |

|        |          |             |             |   |   |        |         |             |                                            |           |    |           |
|--------|----------|-------------|-------------|---|---|--------|---------|-------------|--------------------------------------------|-----------|----|-----------|
| IPCEF1 | 4.33E-07 | rs7759388   | 0.00300347  | A | G | 0.1599 | 0.0200  | rs7759388   | Zhernakova_WHOLEBLOOD-exon-primary         | 1.51E-23  | A  | -10.0008  |
| IPCEF1 | 4.33E-07 | rs7759388   | 0.00300347  | A | G | 0.1599 | 0.0200  | rs7759388   | Zhernakova_WHOLEBLOOD-gene-contextspecific | 1.99E-19  | A  | -9.01372  |
| IPCEF1 | 4.33E-07 | rs7759388   | 0.00300347  | A | G | 0.1599 | 0.0200  | rs7759388   | Zhernakova_WHOLEBLOOD-gene-primary         | 1.99E-19  | A  | -9.01372  |
| IPCEF1 | 4.33E-07 | rs7759388   | 0.00300347  | A | G | 0.1599 | 0.0200  | rs7759388   | Battle_WHOLEBLOOD                          | 2.78E-10  | NA | -9        |
| IPCEF1 | 4.33E-07 | rs1406055   | 0.0498256   | C | G | 0.3214 | 0.0110  | rs1406055   | Zhernakova_WHOLEBLOOD-exon-primary         | 2.26E-153 | C  | 26.3811   |
| IPCEF1 | 4.33E-07 | rs1406055   | 0.0498256   | C | G | 0.3214 | 0.0110  | rs1406055   | Zhernakova_WHOLEBLOOD-exonratio-primary    | 5.96E-128 | C  | 24.0642   |
| IPCEF1 | 4.33E-07 | rs12528985  | 0.676521    | T | C | 0.3486 | -0.0021 | rs12528985  | GTE_SKIN                                   | 1.39E-10  | T  | -0.363454 |
| LAT    | 1.06E-06 | rs8045689   | 6.27E-06    | T | C | 0.7466 | 0.0249  | rs8045689   | Fehrmann_WHOLEBLOOD                        | 5.40E-177 | G  | 28.37     |
| LAT    | 1.06E-06 | rs8045689   | 6.27E-06    | T | C | 0.7466 | 0.0249  | rs8045689   | Zhernakova_WHOLEBLOOD-gene-primary         | 4.73E-19  | C  | 8.91852   |
| LAT    | 1.06E-06 | rs6565261   | 0.000208433 | A | C | 0.2721 | 0.0212  | rs6565261   | Fehrmann_WHOLEBLOOD                        | 2.40E-21  | A  | -9.48     |
| LAT    | 1.06E-06 | rs4788115   | 0.122264    | A | T | 0.2160 | 0.0112  | rs4788115   | Zhernakova_WHOLEBLOOD-exon-primary         | 3.58E-23  | A  | 9.91507   |
| LAT    | 1.06E-06 | rs4788115   | 0.122264    | A | T | 0.2160 | 0.0112  | rs4788115   | Zhernakova_WHOLEBLOOD-exon-primary         | 1.57E-16  | A  | -8.25109  |
| LAT    | 1.06E-06 | rs4788115   | 0.122264    | A | T | 0.2160 | 0.0112  | rs4788115   | Zhernakova_WHOLEBLOOD-gene-primary         | 3.93E-10  | A  | -6.25655  |
| MYO1C  | 1.52E-06 | rs56157500  | 9.23E-05    | A | C | 0.7738 | -0.0239 | rs56157500  | Zhernakova_WHOLEBLOOD-gene-primary         | 3.06E-12  | C  | 6.97484   |
| MYO1C  | 1.52E-06 | rs59343110  | 9.79E-05    | T | C | 0.0748 | -0.0338 | rs59343110  | Zhernakova_WHOLEBLOOD-gene-primary         | 1.82E-13  | T  | 7.36164   |
| MYO1C  | 1.52E-06 | rs59343110  | 9.79E-05    | T | C | 0.0748 | -0.0338 | rs59343110  | Zhernakova_WHOLEBLOOD-gene-contextspecific | 1.84E-11  | T  | 6.71784   |
| MYO1C  | 1.52E-06 | rs147003567 | 0.0395452   | A | G | 0.0595 | 0.0206  | rs147003567 | Zhernakova_WHOLEBLOOD-gene-contextspecific | 2.26E-22  | A  | -9.72914  |
| MYO1C  | 1.52E-06 | rs147003567 | 0.0395452   | A | G | 0.0595 | 0.0206  | rs147003567 | Zhernakova_WHOLEBLOOD-gene-primary         | 2.26E-22  | A  | -9.72914  |
| MYO1C  | 1.52E-06 | rs147003567 | 0.0395452   | A | G | 0.0595 | 0.0206  | rs147003567 | Zhernakova_WHOLEBLOOD-exon-primary         | 1.42E-20  | A  | -9.29855  |
| MYO1C  | 1.52E-06 | rs4790152   | 0.386692    | T | C | 0.5527 | -0.0045 | rs4790152   | Hao_LUNG                                   | 0         | G  | -8.3      |
| NCF4   | 4.85E-08 | rs4821544   | 3.58E-07    | T | C | 0.6854 | -0.0291 | rs4821544   | Fairfax_MONOCYTES-LPS24                    | 6.05E-40  | NA | -9        |
| NCF4   | 4.85E-08 | rs4821544   | 3.58E-07    | T | C | 0.6854 | -0.0291 | rs4821544   | Fairfax_MONOCYTES-LPS24                    | 7.82E-35  | NA | -9        |
| NCF4   | 4.85E-08 | rs4821544   | 3.58E-07    | T | C | 0.6854 | -0.0291 | rs4821544   | Zeller_MONOCYTES                           | 2.25E-28  | NA | -9        |
| NCF4   | 4.85E-08 | rs4821544   | 3.58E-07    | T | C | 0.6854 | -0.0291 | rs4821544   | Westra_WHOLEBLOOD                          | 3.24E-28  | C  | -11.015   |
| NCF4   | 4.85E-08 | rs4821544   | 3.58E-07    | T | C | 0.6854 | -0.0291 | rs4821544   | Fairfax_MONOCYTES-LPS24                    | 8.02E-15  | NA | -9        |
| NCF4   | 4.85E-08 | rs4821544   | 3.58E-07    | T | C | 0.6854 | -0.0291 | rs4821544   | Westra_WHOLEBLOOD                          | 6.52E-13  | C  | -7.18937  |
| NCF4   | 4.85E-08 | rs4821544   | 3.58E-07    | T | C | 0.6854 | -0.0291 | rs4821544   | Raj_MONOCYTES                              | 1.76E-12  | NA | -9        |
| NCF4   | 4.85E-08 | rs4821544   | 3.58E-07    | T | C | 0.6854 | -0.0291 | rs4821544   | Raj_CD4TCELLS                              | 4.44E-12  | NA | -9        |
| NCF4   | 4.85E-08 | rs4821544   | 3.58E-07    | T | C | 0.6854 | -0.0291 | rs4821544   | LloydJones_WHOLEBLOOD                      | 1.20E-11  | C  | -0.199056 |
| NCF4   | 4.85E-08 | rs4821544   | 3.58E-07    | T | C | 0.6854 | -0.0291 | rs4821544   | Quach_MONOCYTES-baseline                   | 1.93E-11  | NA | 0.4       |
| NCF4   | 4.85E-08 | rs4821544   | 3.58E-07    | T | C | 0.6854 | -0.0291 | rs4821544   | Zhernakova_WHOLEBLOOD-gene-primary         | 1.85E-09  | C  | -6.01071  |
| NCF4   | 4.85E-08 | rs5756391   | 8.53E-06    | A | G | 0.3520 | -0.0232 | rs5756391   | Westra_WHOLEBLOOD                          | 3.81E-16  | A  | 8.14455   |
| NCF4   | 4.85E-08 | rs4821549   | 0.0746725   | A | G | 0.0646 | -0.0182 | rs4821549   | Raj_CD4TCELLS                              | 8.38E-29  | NA | -9        |
| NCF4   | 4.85E-08 | rs2072710   | 0.329012    | A | G | 0.2874 | -0.0057 | rs2072710   | Raj_CD4TCELLS                              | 3.43E-70  | NA | -9        |
| NCF4   | 4.85E-08 | rs2072710   | 0.329012    | A | G | 0.2874 | -0.0057 | rs2072710   | Westra_WHOLEBLOOD                          | 3.55E-36  | A  | 12.5591   |
| NCF4   | 4.85E-08 | rs2072710   | 0.329012    | A | G | 0.2874 | -0.0057 | rs2072710   | Kasela_CD4TCELLS                           | 1.34E-19  | A  | 9.05737   |
| NCF4   | 4.85E-08 | rs2072710   | 0.329012    | A | G | 0.2874 | -0.0057 | rs2072710   | Fairfax_MONOCYTES-LPS24                    | 2.13E-13  | NA | -9        |
| NCF4   | 4.85E-08 | rs2072710   | 0.329012    | A | G | 0.2874 | -0.0057 | rs2072710   | Fairfax_MONOCYTES-LPS24                    | 2.29E-11  | NA | -9        |
| NCF4   | 4.85E-08 | rs2072710   | 0.329012    | A | G | 0.2874 | -0.0057 | rs2072710   | Westra_WHOLEBLOOD                          | 1.11E-09  | A  | -6.0922   |
| NCF4   | 4.85E-08 | rs5756363   | 0.353738    | T | G | 0.1276 | -0.0067 | rs5756363   | Westra_WHOLEBLOOD                          | 3.61E-10  | T  | -6.27023  |
| NSMCE1 | 6.62E-07 | rs4523932   | 5.15E-06    | A | G | 0.0119 | -0.1047 | rs4523932   | Nedelec_MACROPHAGES-listeria-asQTL         | 1.40E-22  | NA | 0.130657  |
| NSMCE1 | 6.62E-07 | rs4523932   | 5.15E-06    | A | G | 0.0119 | -0.1047 | rs4523932   | Nedelec_MACROPHAGES-baseline-asQTL         | 1.04E-17  | NA | -0.11553  |
| NSMCE1 | 6.62E-07 | rs9788909   | 0.00370886  | A | G | 0.3452 | 0.0157  | rs9788909   | Zeller_MONOCYTES                           | 1.72E-28  | NA | -9        |
| NSMCE1 | 6.62E-07 | rs9788909   | 0.00370886  | A | G | 0.3452 | 0.0157  | rs9788909   | LloydJones_WHOLEBLOOD                      | 2.00E-12  | A  | 0.206931  |
| NUP43  | 2.08E-06 | rs6909158   | 7.46E-06    | T | C | 0.8078 | -0.0297 | rs9478311   | Westra_WHOLEBLOOD                          | 8.60E-11  | G  | -6.48984  |
| NUP43  | 2.08E-06 | rs4870139   | 1.29E-05    | T | C | 0.6412 | -0.0236 | rs4870139   | Hao_LUNG                                   | 0         | T  | 8.36      |
| NUP43  | 2.08E-06 | rs4870139   | 1.29E-05    | T | C | 0.6412 | -0.0236 | rs4870139   | LloydJones_WHOLEBLOOD                      | 1.70E-149 | C  | -0.738124 |
| NUP43  | 2.08E-06 | rs4870139   | 1.29E-05    | T | C | 0.6412 | -0.0236 | rs4870139   | Zhernakova_WHOLEBLOOD-gene-primary         | 1.88E-97  | C  | -20.9498  |
| NUP43  | 2.08E-06 | rs4870139   | 1.29E-05    | T | C | 0.6412 | -0.0236 | rs4870139   | Fairfax_MONOCYTES-NAIVE                    | 4.66E-74  | NA | -9        |
| NUP43  | 2.08E-06 | rs4870139   | 1.29E-05    | T | C | 0.6412 | -0.0236 | rs4870139   | Raj_CD4TCELLS                              | 4.00E-53  | NA | -9        |
| NUP43  | 2.08E-06 | rs4870139   | 1.29E-05    | T | C | 0.6412 | -0.0236 | rs4870139   | GTE_WHOLEBLOOD                             | 8.91E-20  | C  | -0.422135 |
| NUP43  | 2.08E-06 | rs4870139   | 1.29E-05    | T | C | 0.6412 | -0.0236 | rs4870139   | LloydJones_WHOLEBLOOD                      | 3.10E-15  | C  | -0.223493 |
| NUP43  | 2.08E-06 | rs4870139   | 1.29E-05    | T | C | 0.6412 | -0.0236 | rs4870139   | Davenport_LEUCOCYTES                       | 2.18E-14  | NA | -9        |
| NUP43  | 2.08E-06 | rs4870139   | 1.29E-05    | T | C | 0.6412 | -0.0236 | rs4870139   | Kim_MONOCYTES-LPS                          | 9.04E-11  | NA | -9        |
| NUP43  | 2.08E-06 | rs4870139   | 1.29E-05    | T | C | 0.6412 | -0.0236 | rs4870139   | Kasela_CD8TCELLS                           | 1.89E-10  | C  | -6.37023  |
| NUP43  | 2.08E-06 | rs237004    | 0.000352558 | A | C | 0.3316 | 0.0190  | rs237004    | Fairfax_MONOCYTES-LPS24                    | 1.01E-11  | NA | -9        |
| NUP43  | 2.08E-06 | rs62439806  | 0.00671963  | A | G | 0.0408 | 0.0371  | rs62439806  | Raj_CD4TCELLS                              | 6.89E-32  | NA | -9        |

|        |          |             |             |   |   |        |          |             |                                            |           |    |           |
|--------|----------|-------------|-------------|---|---|--------|----------|-------------|--------------------------------------------|-----------|----|-----------|
| NUP43  | 2.08E-06 | rs62439806  | 0.00671963  | A | G | 0.0408 | Table E4 | rs62439806  | LloydJones_WHOLEBLOOD                      | 1.90E-10  | A  | -0.545214 |
| NUP43  | 2.08E-06 | rs12523685  | 0.0240397   | A | T | 0.7942 | -0.0136  | rs12523685  | LloydJones_WHOLEBLOOD                      | 1.20E-09  | T  | -0.191625 |
| NUP43  | 2.08E-06 | rs2281436   | 0.0272181   | T | C | 0.2874 | 0.0128   | rs2281436   | LloydJones_WHOLEBLOOD                      | 3.60E-10  | T  | -0.191296 |
| NUP43  | 2.08E-06 | rs9379347   | 0.102521    | A | G | 0.0204 | -0.0297  | rs9379347   | Raj_CD4TCELLS                              | 8.84E-10  | NA | -9        |
| NUP43  | 2.08E-06 | rs78765468  | 0.117714    | C | G | 0.0969 | -0.0152  | rs78765468  | LloydJones_WHOLEBLOOD                      | 9.20E-14  | C  | 0.350226  |
| NUP43  | 2.08E-06 | rs112165893 | 0.16007     | C | G | 0.9813 | -0.0288  | rs11263746  | Raj_CD4TCELLS                              | 2.49E-32  | NA | -9        |
| NUP43  | 2.08E-06 | rs112165893 | 0.16007     | C | G | 0.9813 | -0.0288  | rs113263746 | Raj_MONOCYTES                              | 3.67E-26  | NA | -9        |
| NUP43  | 2.08E-06 | rs117067995 | 0.161872    | A | G | 0.0510 | -0.0181  | rs117067995 | Raj_MONOCYTES                              | 3.61E-18  | NA | -9        |
| NUP43  | 2.08E-06 | rs117067995 | 0.161872    | A | G | 0.0510 | -0.0181  | rs117067995 | Raj_CD4TCELLS                              | 1.95E-11  | NA | -9        |
| NUP43  | 2.08E-06 | rs13205080  | 0.186375    | T | C | 0.0544 | -0.0152  | rs13205080  | Raj_MONOCYTES                              | 6.05E-13  | NA | -9        |
| NUP43  | 2.08E-06 | rs13205080  | 0.186375    | T | C | 0.0544 | -0.0152  | rs13205080  | Raj_CD4TCELLS                              | 1.67E-10  | NA | -9        |
| NUP43  | 2.08E-06 | rs2151910   | 0.2168      | A | T | 0.2500 | -0.0074  | rs2151910   | Westra_WHOLEBLOOD                          | 1.09E-41  | A  | 13.5268   |
| NUP43  | 2.08E-06 | rs2151910   | 0.2168      | A | T | 0.2500 | -0.0074  | rs2151910   | LloydJones_WHOLEBLOOD                      | 3.50E-28  | A  | 0.341155  |
| NUP43  | 2.08E-06 | rs2151910   | 0.2168      | A | T | 0.2500 | -0.0074  | rs2151910   | Zhernakova_WHOLEBLOOD-gene-primary         | 9.44E-17  | A  | 8.31178   |
| NUP43  | 2.08E-06 | rs7762285   | 0.266123    | A | G | 0.8622 | 0.0092   | rs7762285   | Westra_WHOLEBLOOD                          | 3.41E-15  | G  | 7.87491   |
| NUP43  | 2.08E-06 | rs4870058   | 0.315372    | A | G | 0.0544 | -0.0145  | rs4870058   | Raj_CD4TCELLS                              | 2.16E-29  | NA | -9        |
| NUP43  | 2.08E-06 | rs4870058   | 0.315372    | A | G | 0.0544 | -0.0145  | rs4870058   | LloydJones_WHOLEBLOOD                      | 7.10E-16  | A  | -0.534455 |
| NUP43  | 2.08E-06 | rs17733403  | 0.358474    | A | G | 0.0646 | -0.0093  | rs17733403  | Westra_WHOLEBLOOD                          | 3.24E-10  | A  | 6.28695   |
| NUP43  | 2.08E-06 | rs6922028   | 0.498364    | T | G | 0.4626 | 0.0035   | rs6922028   | LloydJones_WHOLEBLOOD                      | 3.20E-10  | T  | 0.169703  |
| NUP43  | 2.08E-06 | rs60328093  | 0.546268    | T | C | 0.0102 | -0.0200  | rs200592260 | GTE_WHOLEBLOOD                             | 7.31E-19  | A  | -0.39905  |
| NUP43  | 2.08E-06 | rs60328093  | 0.546268    | T | C | 0.0102 | -0.0200  | rs200592260 | GTE_SKIN                                   | 2.75E-10  | A  | -0.323661 |
| NUP43  | 2.08E-06 | rs9942443   | 0.590615    | A | C | 0.2840 | 0.0031   | rs9942443   | LloydJones_WHOLEBLOOD                      | 5.50E-13  | A  | -0.222816 |
| NUP43  | 2.08E-06 | rs139394852 | 0.652985    | A | C | 0.9235 | -0.0051  | rs139394852 | Raj_CD4TCELLS                              | 1.25E-16  | NA | -9        |
| NUP43  | 2.08E-06 | rs139394852 | 0.652985    | A | C | 0.9235 | -0.0051  | rs139394852 | Raj_MONOCYTES                              | 5.90E-14  | NA | -9        |
| NUP43  | 2.08E-06 | rs2789503   | 0.681245    | A | G | 0.4949 | -0.0021  | rs2789503   | Westra_WHOLEBLOOD                          | 3.28E-30  | G  | -11.4212  |
| NUP43  | 2.08E-06 | rs2789503   | 0.681245    | A | G | 0.4949 | -0.0021  | rs2789503   | LloydJones_WHOLEBLOOD                      | 5.60E-15  | G  | -0.211463 |
| NUP43  | 2.08E-06 | rs2789503   | 0.681245    | A | G | 0.4949 | -0.0021  | rs2789503   | Fairfax_MONOCYTES-NAIVE                    | 1.88E-10  | NA | -9        |
| NUP43  | 2.08E-06 | rs79782857  | 0.727052    | A | T | 0.9864 | -0.0070  | rs79782857  | Raj_CD4TCELLS                              | 4.35E-13  | NA | -9        |
| NUP43  | 2.08E-06 | rs6918774   | 0.935752    | T | C | 0.1327 | -0.0007  | rs6918774   | LloydJones_WHOLEBLOOD                      | 1.50E-11  | T  | -0.288587 |
| OR10J5 | 2.26E-06 | rs2427837   | 1.02E-05    | A | G | 0.2942 | -0.0248  | rs2427837   | Westra_WHOLEBLOOD                          | 6.38E-24  | A  | 10.0858   |
| OR10J5 | 2.26E-06 | rs2494260   | 0.00142189  | T | C | 0.2211 | 0.0186   | rs2494260   | Westra_WHOLEBLOOD                          | 4.32E-13  | T  | -7.24505  |
| OR10J5 | 2.26E-06 | rs6699459   | 0.00911848  | A | G | 0.2058 | -0.0160  | rs6699459   | Westra_WHOLEBLOOD                          | 8.31E-17  | A  | 8.32692   |
| PRR5L  | 9.72E-07 | rs7925585   | 2.78E-06    | A | G | 0.6565 | 0.0244   | rs7925585   | Zhernakova_WHOLEBLOOD-gene-contextspecific | 3.23E-12  | G  | 6.96757   |
| PRR5L  | 9.72E-07 | rs7925585   | 2.78E-06    | A | G | 0.6565 | 0.0244   | rs7925585   | Zhernakova_WHOLEBLOOD-exon-primary         | 2.35E-11  | G  | 6.68226   |
| PRR5L  | 9.72E-07 | rs7925585   | 2.78E-06    | A | G | 0.6565 | 0.0244   | rs7925585   | Zhernakova_WHOLEBLOOD-gene-primary         | 3.72E-11  | G  | 6.6152    |
| PRR5L  | 9.72E-07 | rs12270539  | 0.000107622 | T | C | 0.0374 | 0.0593   | rs12270539  | LloydJones_WHOLEBLOOD                      | 2.90E-27  | T  | -0.819609 |
| PRR5L  | 9.72E-07 | rs429034    | 0.117757    | A | T | 0.7721 | 0.0099   | rs429034    | Zhernakova_WHOLEBLOOD-gene-primary         | 4.15E-19  | T  | -8.93263  |
| PRR5L  | 9.72E-07 | rs429034    | 0.117757    | A | T | 0.7721 | 0.0099   | rs429034    | Zhernakova_WHOLEBLOOD-exon-primary         | 4.02E-17  | T  | -8.41232  |
| PRR5L  | 9.72E-07 | rs429034    | 0.117757    | A | T | 0.7721 | 0.0099   | rs429034    | Zhernakova_WHOLEBLOOD-gene-contextspecific | 3.41E-16  | T  | -8.15788  |
| PRR5L  | 9.72E-07 | rs1123347   | 0.367446    | T | G | 0.4303 | 0.0046   | rs1123347   | Zhernakova_WHOLEBLOOD-exonratio-primary    | 1.96E-59  | T  | 16.2581   |
| PRR5L  | 9.72E-07 | rs1123347   | 0.367446    | T | G | 0.4303 | 0.0046   | rs1123347   | Zhernakova_WHOLEBLOOD-exonratio-primary    | 3.01E-35  | T  | -12.3886  |
| PRR5L  | 9.72E-07 | rs1123347   | 0.367446    | T | G | 0.4303 | 0.0046   | rs1123347   | Zhernakova_WHOLEBLOOD-exonratio-primary    | 3.03E-34  | T  | -12.2021  |
| PRR5L  | 9.72E-07 | rs1123347   | 0.367446    | T | G | 0.4303 | 0.0046   | rs1123347   | Zhernakova_WHOLEBLOOD-exonratio-primary    | 1.99E-25  | T  | -10.421   |
| PRR5L  | 9.72E-07 | rs1123347   | 0.367446    | T | G | 0.4303 | 0.0046   | rs1123347   | Zhernakova_WHOLEBLOOD-gene-primary         | 2.37E-21  | T  | 9.4876    |
| PRR5L  | 9.72E-07 | rs1123347   | 0.367446    | T | G | 0.4303 | 0.0046   | rs1123347   | Zhernakova_WHOLEBLOOD-exonratio-primary    | 3.77E-19  | T  | -8.94371  |
| PRR5L  | 9.72E-07 | rs1123347   | 0.367446    | T | G | 0.4303 | 0.0046   | rs1123347   | Zhernakova_WHOLEBLOOD-exon-primary         | 1.48E-14  | T  | 7.68951   |
| PRR5L  | 9.72E-07 | rs1123347   | 0.367446    | T | G | 0.4303 | 0.0046   | rs1123347   | Zhernakova_WHOLEBLOOD-exonratio-primary    | 1.88E-13  | T  | -7.35723  |
| PRR5L  | 9.72E-07 | rs1123347   | 0.367446    | T | G | 0.4303 | 0.0046   | rs1123347   | Zhernakova_WHOLEBLOOD-exonratio-primary    | 5.43E-11  | T  | -6.55878  |
| PRR5L  | 9.72E-07 | rs12785381  | 0.492162    | T | C | 0.0986 | 0.0061   | rs12785381  | Zhernakova_WHOLEBLOOD-exonratio-primary    | 1.06E-28  | T  | -11.1153  |
| PRR5L  | 9.72E-07 | rs12785381  | 0.492162    | T | C | 0.0986 | 0.0061   | rs12785381  | Zhernakova_WHOLEBLOOD-exon-primary         | 1.95E-27  | T  | -10.8518  |
| PRR5L  | 9.72E-07 | rs10836545  | 0.82493     | A | G | 0.9082 | 0.0021   | rs10836545  | Zhernakova_WHOLEBLOOD-exon-primary         | 5.84E-10  | G  | 6.19496   |
| PTPLA  | 8.16E-07 | rs7092926   | 6.75E-07    | T | G | 0.4320 | 0.0259   | rs7092926   | Zhernakova_WHOLEBLOOD-gene-primary         | 4.91E-12  | T  | -6.90808  |
| PTPLA  | 8.16E-07 | rs7092926   | 6.75E-07    | T | G | 0.4320 | 0.0259   | rs7092926   | Zhernakova_WHOLEBLOOD-gene-contextspecific | 4.91E-12  | T  | -6.90808  |
| PTPLA  | 8.16E-07 | rs17141430  | 0.0127591   | A | G | 0.8759 | -0.0203  | rs17141430  | Westra_WHOLEBLOOD                          | 3.55E-10  | G  | -6.27279  |
| PTPLA  | 8.16E-07 | rs78704091  | 0.0276797   | A | T | 0.0680 | -0.0184  | rs78704091  | Zhernakova_WHOLEBLOOD-gene-primary         | 1.05E-11  | A  | 6.79888   |
| PTPLA  | 8.16E-07 | rs7094705   | 0.0361169   | A | G | 0.3844 | 0.0111   | rs7094705   | Westra_WHOLEBLOOD                          | 6.95E-23  | A  | 9.84877   |
| PVALB  | 1.27E-07 | rs4821544   | 3.58E-07    | T | C | 0.6854 | -0.0291  | rs4821544   | LloydJones_WHOLEBLOOD                      | 1.20E-243 | C  | -0.971171 |

|               |          |            |             |   |   |        |         |            |                                            |           |    |           |
|---------------|----------|------------|-------------|---|---|--------|---------|------------|--------------------------------------------|-----------|----|-----------|
| PVALB         | 1.27E-07 | rs4821544  | 3.58E-07    | T | C | 0.6854 | -0.0291 | rs4821544  | Zhernakova_WHOLEBLOOD-gene-contextspecific | 1.61E-202 | C  | -30.3645  |
| PVALB         | 1.27E-07 | rs4821544  | 3.58E-07    | T | C | 0.6854 | -0.0291 | rs4821544  | Zhernakova_WHOLEBLOOD-gene-primary         | 1.61E-202 | C  | -30.3645  |
| PVALB         | 1.27E-07 | rs4821544  | 3.58E-07    | T | C | 0.6854 | -0.0291 | rs4821544  | Zhernakova_WHOLEBLOOD-exon-primary         | 9.85E-174 | C  | -28.0997  |
| PVALB         | 1.27E-07 | rs4821544  | 3.58E-07    | T | C | 0.6854 | -0.0291 | rs4821544  | Zhernakova_WHOLEBLOOD-exon-primary         | 1.58E-168 | C  | -27.6705  |
| PVALB         | 1.27E-07 | rs4821544  | 3.58E-07    | T | C | 0.6854 | -0.0291 | rs4821544  | Zhernakova_WHOLEBLOOD-exon-primary         | 3.02E-154 | C  | -26.457   |
| PVALB         | 1.27E-07 | rs4821544  | 3.58E-07    | T | C | 0.6854 | -0.0291 | rs4821544  | Zeller_MONOCYTES                           | 9.09E-150 | NA | -9        |
| PVALB         | 1.27E-07 | rs4821544  | 3.58E-07    | T | C | 0.6854 | -0.0291 | rs4821544  | Battle_WHOLEBLOOD                          | 7.06E-135 | NA | -9        |
| PVALB         | 1.27E-07 | rs4821544  | 3.58E-07    | T | C | 0.6854 | -0.0291 | rs4821544  | Zhernakova_WHOLEBLOOD-exon-primary         | 6.01E-126 | C  | -23.8717  |
| PVALB         | 1.27E-07 | rs4821544  | 3.58E-07    | T | C | 0.6854 | -0.0291 | rs4821544  | Fehrmann_WHOLEBLOOD                        | 8.30E-100 | G  | -21.21    |
| PVALB         | 1.27E-07 | rs4821544  | 3.58E-07    | T | C | 0.6854 | -0.0291 | rs4821544  | Jansen_WHOLEBLOOD                          | 4.40E-93  | C  | -0.436    |
| PVALB         | 1.27E-07 | rs4821544  | 3.58E-07    | T | C | 0.6854 | -0.0291 | rs4821544  | Walsh_WHOLEBLOOD                           | 1.45E-28  | T  | 0.810608  |
| PVALB         | 1.27E-07 | rs4821544  | 3.58E-07    | T | C | 0.6854 | -0.0291 | rs4821544  | GTE_WHOLEBLOOD                             | 2.20E-27  | C  | -0.575968 |
| PVALB         | 1.27E-07 | rs4821544  | 3.58E-07    | T | C | 0.6854 | -0.0291 | rs4821544  | Battle_WHOLEBLOOD-ase                      | 1.58E-21  | NA | -9        |
| PVALB         | 1.27E-07 | rs4821544  | 3.58E-07    | T | C | 0.6854 | -0.0291 | rs4821544  | Zhernakova_WHOLEBLOOD-exonratio-primary    | 3.09E-18  | C  | -8.70802  |
| PVALB         | 1.27E-07 | rs4821544  | 3.58E-07    | T | C | 0.6854 | -0.0291 | rs4821544  | Fehrmann_WHOLEBLOOD                        | 2.10E-17  | C  | -8.49     |
| PVALB         | 1.27E-07 | rs4821544  | 3.58E-07    | T | C | 0.6854 | -0.0291 | rs4821544  | Davenport_LEUCOCYTES                       | 4.57E-15  | NA | -9        |
| PVALB         | 1.27E-07 | rs4821544  | 3.58E-07    | T | C | 0.6854 | -0.0291 | rs4821544  | Dinarzo_WHOLEBLOOD                         | 1.07E-11  | T  | 0.993866  |
| PVALB         | 1.27E-07 | rs4821544  | 3.58E-07    | T | C | 0.6854 | -0.0291 | rs4821544  | Zhernakova_WHOLEBLOOD-polyAratio-primary   | 2.07E-11  | C  | -6.70078  |
| PVALB         | 1.27E-07 | rs1015775  | 0.000118906 | A | G | 0.1769 | -0.0263 | rs1015775  | LloydJones_WHOLEBLOOD                      | 8.20E-69  | A  | 0.625638  |
| PVALB         | 1.27E-07 | rs1015775  | 0.000118906 | A | G | 0.1769 | -0.0263 | rs1015775  | Zhernakova_WHOLEBLOOD-gene-primary         | 2.79E-44  | A  | 13.9587   |
| PVALB         | 1.27E-07 | rs1015775  | 0.000118906 | A | G | 0.1769 | -0.0263 | rs1015775  | Walsh_WHOLEBLOOD                           | 3.33E-14  | A  | 0.711935  |
| PVALB         | 1.27E-07 | rs730483   | 0.0661628   | A | C | 0.0816 | 0.0163  | rs730483   | LloydJones_WHOLEBLOOD                      | 5.00E-19  | A  | -0.397495 |
| PVALB         | 1.27E-07 | rs730483   | 0.0661628   | A | C | 0.0816 | 0.0163  | rs730483   | Zhernakova_WHOLEBLOOD-gene-primary         | 1.72E-18  | A  | -8.77384  |
| PVALB         | 1.27E-07 | rs74971025 | 0.0668636   | A | G | 0.8435 | -0.0135 | rs74971025 | Zhernakova_WHOLEBLOOD-gene-contextspecific | 1.37E-12  | G  | -7.08692  |
| PVALB         | 1.27E-07 | rs74971025 | 0.0668636   | A | G | 0.8435 | -0.0135 | rs74971025 | LloydJones_WHOLEBLOOD                      | 4.60E-11  | G  | -0.258926 |
| PVALB         | 1.27E-07 | rs74971025 | 0.0668636   | A | G | 0.8435 | -0.0135 | rs74971025 | Zhernakova_WHOLEBLOOD-exon-primary         | 9.22E-11  | G  | -6.47915  |
| PVALB         | 1.27E-07 | rs74971025 | 0.0668636   | A | G | 0.8435 | -0.0135 | rs74971025 | Zhernakova_WHOLEBLOOD-gene-primary         | 4.15E-10  | G  | -6.24834  |
| PVALB         | 1.27E-07 | rs4820250  | 0.342696    | A | G | 0.1344 | -0.0068 | rs4820250  | Fairfax_MONOCYTES-LPS24                    | 9.04E-15  | NA | -9        |
| RBM15B        | 1.41E-07 | rs73078636 | 1.41E-07    | A | G | 0.1480 | -0.0403 | rs73078636 | Zhernakova_WHOLEBLOOD-exon-primary         | 2.14E-52  | A  | 15.233    |
| RBM15B        | 1.41E-07 | rs73078636 | 1.41E-07    | A | G | 0.1480 | -0.0403 | rs73078636 | Zhernakova_WHOLEBLOOD-gene-contextspecific | 2.08E-44  | A  | 13.9794   |
| RBM15B        | 1.41E-07 | rs73078636 | 1.41E-07    | A | G | 0.1480 | -0.0403 | rs73078636 | Zhernakova_WHOLEBLOOD-gene-primary         | 2.08E-44  | A  | 13.9794   |
| RBM15B        | 1.41E-07 | rs73078636 | 1.41E-07    | A | G | 0.1480 | -0.0403 | rs73078636 | Jansen_WHOLEBLOOD                          | 8.50E-13  | A  | 0.146     |
| RP11-24N18.1  | 1.71E-06 | rs8056890  | 1.71E-06    | A | G | 0.2959 | -0.0254 | rs8056890  | Zhernakova_WHOLEBLOOD-exon-primary         | 3.78E-22  | A  | -9.67673  |
| RP11-24N18.1  | 1.71E-06 | rs8056890  | 1.71E-06    | A | G | 0.2959 | -0.0254 | rs8056890  | Zhernakova_WHOLEBLOOD-gene-primary         | 1.27E-20  | A  | -9.31092  |
| RP11-24N18.1  | 1.71E-06 | rs8056890  | 1.71E-06    | A | G | 0.2959 | -0.0254 | rs8056890  | Zhernakova_WHOLEBLOOD-gene-contextspecific | 1.27E-20  | A  | -9.31092  |
| RP11-264B17.4 | 1.05E-06 | rs8045689  | 6.27E-06    | T | C | 0.7466 | 0.0249  | rs8045689  | Zhernakova_WHOLEBLOOD-exon-primary         | 3.51E-130 | C  | 24.276    |
| RP11-264B17.4 | 1.05E-06 | rs8045689  | 6.27E-06    | T | C | 0.7466 | 0.0249  | rs8045689  | Zhernakova_WHOLEBLOOD-gene-primary         | 4.38E-116 | C  | 22.9027   |
| RP11-264B17.4 | 1.05E-06 | rs8045689  | 6.27E-06    | T | C | 0.7466 | 0.0249  | rs8045689  | Zhernakova_WHOLEBLOOD-gene-contextspecific | 4.38E-116 | C  | 22.9027   |
| RP11-264B17.4 | 1.05E-06 | rs67479058 | 0.000161762 | T | C | 0.8503 | -0.0258 | rs67479058 | Zhernakova_WHOLEBLOOD-gene-primary         | 2.55E-13  | C  | -7.3162   |
| RP11-264B17.4 | 1.05E-06 | rs12448482 | 0.197731    | A | G | 0.3861 | 0.0071  | rs12448482 | Zhernakova_WHOLEBLOOD-gene-primary         | 2.51E-24  | A  | -10.1769  |
| RP11-534L20.5 | 1.32E-06 | rs11117858 | 8.09E-06    | T | G | 0.7840 | -0.0287 | rs11117858 | Zhernakova_WHOLEBLOOD-gene-primary         | 4.88E-54  | G  | -15.4778  |
| RP11-534L20.5 | 1.32E-06 | rs11117858 | 8.09E-06    | T | G | 0.7840 | -0.0287 | rs11117858 | Kasela_CD4TCELLS                           | 7.94E-11  | G  | -6.5018   |
| RP11-534L20.5 | 1.32E-06 | rs11117858 | 8.09E-06    | T | G | 0.7840 | -0.0287 | rs11117858 | Kasela_CD8TCELLS                           | 1.12E-09  | G  | -6.09141  |
| RP11-534L20.5 | 1.32E-06 | rs874718   | 5.06E-05    | A | C | 0.4728 | 0.0211  | rs874718   | Zhernakova_WHOLEBLOOD-gene-primary         | 5.77E-288 | C  | 36.2652   |
| RP11-534L20.5 | 1.32E-06 | rs874718   | 5.06E-05    | A | C | 0.4728 | 0.0211  | rs874718   | Walsh_WHOLEBLOOD                           | 1.69E-62  | A  | -0.975764 |
| RP11-534L20.5 | 1.32E-06 | rs874718   | 5.06E-05    | A | C | 0.4728 | 0.0211  | rs874718   | Kasela_CD4TCELLS                           | 3.09E-49  | A  | -14.7498  |
| RP11-534L20.5 | 1.32E-06 | rs874718   | 5.06E-05    | A | C | 0.4728 | 0.0211  | rs874718   | Kasela_CD8TCELLS                           | 2.55E-43  | A  | -13.8     |
| RP11-534L20.5 | 1.32E-06 | rs874718   | 5.06E-05    | A | C | 0.4728 | 0.0211  | rs874718   | GTE_SKIN                                   | 1.09E-19  | C  | 0.690688  |
| RP11-534L20.5 | 1.32E-06 | rs874718   | 5.06E-05    | A | C | 0.4728 | 0.0211  | rs874718   | GTE_WHOLEBLOOD                             | 1.57E-17  | C  | 0.600601  |
| RP11-534L20.5 | 1.32E-06 | rs874718   | 5.06E-05    | A | C | 0.4728 | 0.0211  | rs874718   | GTE_SKIN                                   | 7.58E-16  | C  | 0.743489  |
| RP11-534L20.5 | 1.32E-06 | rs874718   | 5.06E-05    | A | C | 0.4728 | 0.0211  | rs874718   | GTE_FIBROBLASTS                            | 1.21E-11  | C  | 0.564444  |
| RP11-534L20.5 | 1.32E-06 | rs874718   | 5.06E-05    | A | C | 0.4728 | 0.0211  | rs874718   | GTE_LUNG                                   | 7.63E-10  | C  | 0.545556  |
| RP11-534L20.5 | 1.32E-06 | rs2987936  | 0.000433746 | C | G | 0.5357 | -0.0176 | rs2987936  | Zhernakova_WHOLEBLOOD-gene-primary         | 5.63E-70  | G  | -17.6833  |
| RP11-534L20.5 | 1.32E-06 | rs2987936  | 0.000433746 | C | G | 0.5357 | -0.0176 | rs2987936  | Kasela_CD4TCELLS                           | 5.97E-14  | G  | -7.5086   |
| RP11-534L20.5 | 1.32E-06 | rs2987936  | 0.000433746 | C | G | 0.5357 | -0.0176 | rs2987936  | Kasela_CD8TCELLS                           | 6.02E-12  | G  | -6.87903  |
| RP11-534L20.5 | 1.32E-06 | rs2297546  | 0.00571061  | C | G | 0.5901 | -0.0158 | rs2297546  | Zhernakova_WHOLEBLOOD-gene-primary         | 1.52E-79  | G  | -18.8846  |
| RP11-534L20.5 | 1.32E-06 | rs41299005 | 0.0199849   | T | C | 0.0663 | -0.0209 | rs41299005 | Zhernakova_WHOLEBLOOD-gene-primary         | 2.23E-39  | T  | 13.1298   |

|               |          |            |             |   |   |        |         |            |                                            |           |    |           |
|---------------|----------|------------|-------------|---|---|--------|---------|------------|--------------------------------------------|-----------|----|-----------|
| RP11-534L20.5 | 1.32E-06 | rs35785716 | 0.060621    | T | C | 0.2517 | 0.0113  | rs35785716 | Zhernakova_WHOLEBLOOD-gene-primary         | 6.88E-28  | T  | 10.9469   |
| RP11-534L20.5 | 1.32E-06 | rs35785716 | 0.060621    | T | C | 0.2517 | -0.0113 | rs35785716 | Kasela_CD8TCELLS                           | 2.13E-10  | T  | 6.35156   |
| RP11-534L20.5 | 1.32E-06 | rs2336941  | 0.0952277   | T | C | 0.1684 | 0.0109  | rs2336941  | Zhernakova_WHOLEBLOOD-gene-primary         | 2.35E-107 | T  | -22.0092  |
| RP11-534L20.5 | 1.32E-06 | rs2336941  | 0.0952277   | T | C | 0.1684 | 0.0109  | rs2336941  | Kasela_CD4TCELLS                           | 1.45E-24  | T  | -10.2303  |
| RP11-534L20.5 | 1.32E-06 | rs2336941  | 0.0952277   | T | C | 0.1684 | 0.0109  | rs2336941  | Kasela_CD8TCELLS                           | 2.63E-19  | T  | -8.98323  |
| RP11-534L20.5 | 1.32E-06 | rs2336941  | 0.0952277   | T | C | 0.1684 | 0.0109  | rs2336941  | Walsh_WHOLEBLOOD                           | 1.23E-12  | T  | -0.621843 |
| RP11-534L20.5 | 1.32E-06 | rs7538261  | 0.112295    | A | G | 0.0629 | 0.0201  | rs7538261  | Zhernakova_WHOLEBLOOD-gene-primary         | 8.71E-17  | A  | -8.32111  |
| RP11-534L20.5 | 1.32E-06 | rs74882519 | 0.374648    | A | G | 0.0782 | -0.0116 | rs74882519 | Zhernakova_WHOLEBLOOD-gene-primary         | 6.63E-51  | A  | 15.0069   |
| RP11-534L20.5 | 1.32E-06 | rs6666087  | 0.376914    | T | C | 0.5748 | -0.0046 | rs6666087  | Zhernakova_WHOLEBLOOD-gene-primary         | 2.96E-12  | C  | -6.97923  |
| RP11-534L20.5 | 1.32E-06 | rs61816859 | 0.415005    | T | C | 0.0578 | 0.0109  | rs61816859 | Zhernakova_WHOLEBLOOD-gene-primary         | 1.36E-14  | T  | -7.69955  |
| RP11-534L20.5 | 1.32E-06 | rs17433909 | 0.70506     | T | C | 0.0612 | 0.0051  | rs17433909 | Zhernakova_WHOLEBLOOD-gene-primary         | 1.11E-12  | T  | -7.11548  |
| SPNS1         | 3.51E-09 | rs2726040  | 4.84E-06    | C | G | 0.5748 | -0.0238 | rs2726040  | LloydJones_WHOLEBLOOD                      | 5.10E-40  | G  | -0.374583 |
| SPNS1         | 3.51E-09 | rs8045689  | 6.27E-06    | T | C | 0.7466 | 0.0249  | rs8045689  | Zhernakova_WHOLEBLOOD-gene-primary         | 7.23E-258 | C  | 34.3026   |
| SPNS1         | 3.51E-09 | rs8045689  | 6.27E-06    | T | C | 0.7466 | 0.0249  | rs8045689  | Zhernakova_WHOLEBLOOD-gene-contextspecific | 7.23E-258 | C  | 34.3026   |
| SPNS1         | 3.51E-09 | rs8045689  | 6.27E-06    | T | C | 0.7466 | 0.0249  | rs8045689  | Zhernakova_WHOLEBLOOD-exon-primary         | 1.54E-237 | C  | 32.9109   |
| SPNS1         | 3.51E-09 | rs8045689  | 6.27E-06    | T | C | 0.7466 | 0.0249  | rs8045689  | LloydJones_WHOLEBLOOD                      | 9.20E-233 | C  | 0.959846  |
| SPNS1         | 3.51E-09 | rs8045689  | 6.27E-06    | T | C | 0.7466 | 0.0249  | rs8045689  | Battle_WHOLEBLOOD                          | 9.62E-226 | NA | -9        |
| SPNS1         | 3.51E-09 | rs8045689  | 6.27E-06    | T | C | 0.7466 | 0.0249  | rs8045689  | Westra_WHOLEBLOOD                          | 9.81E-198 | C  | 50.796    |
| SPNS1         | 3.51E-09 | rs8045689  | 6.27E-06    | T | C | 0.7466 | 0.0249  | rs8045689  | Fehrmann_WHOLEBLOOD                        | 5.40E-177 | G  | 28.37     |
| SPNS1         | 3.51E-09 | rs8045689  | 6.27E-06    | T | C | 0.7466 | 0.0249  | rs8045689  | Zhernakova_WHOLEBLOOD-exon-primary         | 8.15E-166 | C  | 27.4443   |
| SPNS1         | 3.51E-09 | rs8045689  | 6.27E-06    | T | C | 0.7466 | 0.0249  | rs8045689  | Zhernakova_WHOLEBLOOD-exon-primary         | 6.31E-153 | C  | 26.3424   |
| SPNS1         | 3.51E-09 | rs8045689  | 6.27E-06    | T | C | 0.7466 | 0.0249  | rs8045689  | Zhernakova_WHOLEBLOOD-exon-primary         | 7.74E-143 | C  | 25.4465   |
| SPNS1         | 3.51E-09 | rs8045689  | 6.27E-06    | T | C | 0.7466 | 0.0249  | rs8045689  | Zeller_MONOCYTES                           | 3.69E-133 | NA | -9        |
| SPNS1         | 3.51E-09 | rs8045689  | 6.27E-06    | T | C | 0.7466 | 0.0249  | rs8045689  | Zhernakova_WHOLEBLOOD-exon-primary         | 3.51E-130 | C  | 24.276    |
| SPNS1         | 3.51E-09 | rs8045689  | 6.27E-06    | T | C | 0.7466 | 0.0249  | rs8045689  | Zhernakova_WHOLEBLOOD-gene-primary         | 4.38E-116 | C  | 22.9027   |
| SPNS1         | 3.51E-09 | rs8045689  | 6.27E-06    | T | C | 0.7466 | 0.0249  | rs8045689  | Zhernakova_WHOLEBLOOD-gene-contextspecific | 4.38E-116 | C  | 22.9027   |
| SPNS1         | 3.51E-09 | rs8045689  | 6.27E-06    | T | C | 0.7466 | 0.0249  | rs8045689  | Zhernakova_WHOLEBLOOD-exon-primary         | 5.38E-107 | C  | 21.9716   |
| SPNS1         | 3.51E-09 | rs8045689  | 6.27E-06    | T | C | 0.7466 | 0.0249  | rs8045689  | Zhernakova_WHOLEBLOOD-exon-primary         | 3.90E-94  | C  | 20.5831   |
| SPNS1         | 3.51E-09 | rs8045689  | 6.27E-06    | T | C | 0.7466 | 0.0249  | rs8045689  | Fairfax_MONOCYTES-LPS24                    | 1.23E-73  | NA | -9        |
| SPNS1         | 3.51E-09 | rs8045689  | 6.27E-06    | T | C | 0.7466 | 0.0249  | rs8045689  | Davenport_LEUCOCYTES                       | 5.62E-30  | NA | -9        |
| SPNS1         | 3.51E-09 | rs8045689  | 6.27E-06    | T | C | 0.7466 | 0.0249  | rs8045689  | Grundberg_LCLS                             | 2.72E-29  | T  | -0.153062 |
| SPNS1         | 3.51E-09 | rs8045689  | 6.27E-06    | T | C | 0.7466 | 0.0249  | rs8045689  | GTE_WHOLEBLOOD                             | 1.93E-24  | T  | -0.284129 |
| SPNS1         | 3.51E-09 | rs8045689  | 6.27E-06    | T | C | 0.7466 | 0.0249  | rs8045689  | Kim_MONOCYTES-LPS                          | 2.25E-22  | NA | -9        |
| SPNS1         | 3.51E-09 | rs8045689  | 6.27E-06    | T | C | 0.7466 | 0.0249  | rs8045689  | Raj_MONOCYTES                              | 2.62E-22  | NA | -9        |
| SPNS1         | 3.51E-09 | rs8045689  | 6.27E-06    | T | C | 0.7466 | 0.0249  | rs8045689  | Geuvaldis_LCLS                             | 1.37E-21  | NA | -9        |
| SPNS1         | 3.51E-09 | rs8045689  | 6.27E-06    | T | C | 0.7466 | 0.0249  | rs8045689  | Geuvaldis_LCLS                             | 1.91E-21  | NA | -9        |
| SPNS1         | 3.51E-09 | rs8045689  | 6.27E-06    | T | C | 0.7466 | 0.0249  | rs8045689  | Geuvaldis_LCLS                             | 5.01E-21  | NA | -9        |
| SPNS1         | 3.51E-09 | rs8045689  | 6.27E-06    | T | C | 0.7466 | 0.0249  | rs8045689  | Geuvaldis_LCLS                             | 1.50E-20  | NA | -9        |
| SPNS1         | 3.51E-09 | rs8045689  | 6.27E-06    | T | C | 0.7466 | 0.0249  | rs8045689  | Geuvaldis_LCLS                             | 2.07E-20  | NA | -9        |
| SPNS1         | 3.51E-09 | rs8045689  | 6.27E-06    | T | C | 0.7466 | 0.0249  | rs8045689  | Geuvaldis_LCLS                             | 1.41E-19  | NA | -9        |
| SPNS1         | 3.51E-09 | rs8045689  | 6.27E-06    | T | C | 0.7466 | 0.0249  | rs8045689  | Zhernakova_WHOLEBLOOD-gene-primary         | 4.73E-19  | C  | 8.91852   |
| SPNS1         | 3.51E-09 | rs8045689  | 6.27E-06    | T | C | 0.7466 | 0.0249  | rs8045689  | Kim_MONOCYTES-Baseline                     | 8.22E-18  | NA | -9        |
| SPNS1         | 3.51E-09 | rs8045689  | 6.27E-06    | T | C | 0.7466 | 0.0249  | rs8045689  | Geuvaldis_LCLS                             | 1.10E-16  | NA | -9        |
| SPNS1         | 3.51E-09 | rs8045689  | 6.27E-06    | T | C | 0.7466 | 0.0249  | rs8045689  | Geuvaldis_LCLS                             | 6.93E-16  | NA | -9        |
| SPNS1         | 3.51E-09 | rs8045689  | 6.27E-06    | T | C | 0.7466 | 0.0249  | rs8045689  | Geuvaldis_LCLS                             | 1.50E-14  | NA | -9        |
| SPNS1         | 3.51E-09 | rs8045689  | 6.27E-06    | T | C | 0.7466 | 0.0249  | rs8045689  | GTE_LCLS                                   | 8.03E-14  | T  | -0.841903 |
| SPNS1         | 3.51E-09 | rs8045689  | 6.27E-06    | T | C | 0.7466 | 0.0249  | rs8045689  | Geuvaldis_LCLS                             | 1.04E-13  | NA | -9        |
| SPNS1         | 3.51E-09 | rs8045689  | 6.27E-06    | T | C | 0.7466 | 0.0249  | rs8045689  | Geuvaldis_LCLS                             | 4.34E-13  | NA | -9        |
| SPNS1         | 3.51E-09 | rs8045689  | 6.27E-06    | T | C | 0.7466 | 0.0249  | rs8045689  | Raj_CD4TCELLS                              | 3.76E-10  | NA | -9        |
| SPNS1         | 3.51E-09 | rs8045689  | 6.27E-06    | T | C | 0.7466 | 0.0249  | rs8045689  | Dixon_LCLS                                 | 2.10E-09  | C  | -0.508    |
| SPNS1         | 3.51E-09 | rs151230   | 2.06E-05    | A | G | 0.1190 | 0.0326  | rs151230   | LloydJones_WHOLEBLOOD                      | 1.00E-10  | A  | -0.276115 |
| SPNS1         | 3.51E-09 | rs67479058 | 0.000161762 | T | C | 0.8503 | -0.0258 | rs67479058 | Zhernakova_WHOLEBLOOD-gene-primary         | 3.87E-21  | C  | -9.43608  |
| SPNS1         | 3.51E-09 | rs67479058 | 0.000161762 | T | C | 0.8503 | -0.0258 | rs67479058 | LloydJones_WHOLEBLOOD                      | 1.70E-18  | C  | -0.323235 |
| SPNS1         | 3.51E-09 | rs67479058 | 0.000161762 | T | C | 0.8503 | -0.0258 | rs67479058 | Zhernakova_WHOLEBLOOD-gene-primary         | 2.55E-13  | C  | -7.3162   |
| SPNS1         | 3.51E-09 | rs7201546  | 0.00291959  | T | C | 0.1480 | 0.0240  | rs7201546  | Westra_WHOLEBLOOD                          | 3.16E-16  | T  | -8.16732  |
| SPNS1         | 3.51E-09 | rs7201546  | 0.00291959  | T | C | 0.1480 | 0.0240  | rs7201546  | LloydJones_WHOLEBLOOD                      | 7.10E-12  | T  | -0.279907 |
| SPNS1         | 3.51E-09 | rs7201546  | 0.00291959  | T | C | 0.1480 | 0.0240  | rs7201546  | Zhernakova_WHOLEBLOOD-gene-primary         | 1.48E-11  | T  | -6.75016  |

| Gene    | SNP      | Lead SNP    | Distance   | Strand | Allele | Effect Size | SE      | Table   | SNP         | Gene                                       | Distance  | Strand | Effect Size |
|---------|----------|-------------|------------|--------|--------|-------------|---------|---------|-------------|--------------------------------------------|-----------|--------|-------------|
| SPNS1   | 3.51E-09 | rs11643913  | 0.0032946  | A      | G      | 0.0629      | 0.0519  | 0.0519  | rs11643913  | LloydJones_WHOLEBLOOD                      | 9.00E-14  | A      | -0.551074   |
| SPNS1   | 3.51E-09 | rs11569775  | 0.146547   | C      | G      | 0.9728      | 0.0206  | 0.0206  | rs11569775  | LloydJones_WHOLEBLOOD                      | 3.80E-22  | G      | 0.71576     |
| SPNS1   | 3.51E-09 | rs7499778   | 0.193516   | A      | G      | 0.5357      | -0.0073 | -0.0073 | rs7499778   | Zhernakova_WHOLEBLOOD-gene-primary         | 8.36E-22  | G      | 9.59551     |
| SPNS1   | 3.51E-09 | rs7499778   | 0.193516   | A      | G      | 0.5357      | -0.0073 | -0.0073 | rs7499778   | LloydJones_WHOLEBLOOD                      | 1.50E-12  | A      | -0.195003   |
| SPNS1   | 3.51E-09 | rs12448482  | 0.197731   | A      | G      | 0.3861      | 0.0071  | 0.0071  | rs12448482  | Westra_WHOLEBLOOD                          | 4.65E-116 | A      | -22.9       |
| SPNS1   | 3.51E-09 | rs12448482  | 0.197731   | A      | G      | 0.3861      | 0.0071  | 0.0071  | rs12448482  | LloydJones_WHOLEBLOOD                      | 1.10E-62  | A      | -0.479659   |
| SPNS1   | 3.51E-09 | rs12448482  | 0.197731   | A      | G      | 0.3861      | 0.0071  | 0.0071  | rs12448482  | Zhernakova_WHOLEBLOOD-gene-primary         | 5.75E-60  | A      | -16.3329    |
| SPNS1   | 3.51E-09 | rs12448482  | 0.197731   | A      | G      | 0.3861      | 0.0071  | 0.0071  | rs12448482  | Zeller_MONOCYTES                           | 2.31E-27  | NA     | -9          |
| SPNS1   | 3.51E-09 | rs12448482  | 0.197731   | A      | G      | 0.3861      | 0.0071  | 0.0071  | rs12448482  | Zhernakova_WHOLEBLOOD-gene-primary         | 2.51E-24  | A      | -10.1769    |
| SPNS1   | 3.51E-09 | rs12448482  | 0.197731   | A      | G      | 0.3861      | 0.0071  | 0.0071  | rs12448482  | Grundberg_LCLS                             | 2.76E-10  | G      | 0.0862493   |
| SPNS1   | 3.51E-09 | rs139456978 | 0.461272   | T      | C      | 0.0493      | -0.0091 | -0.0091 | rs139456978 | Zhernakova_WHOLEBLOOD-gene-primary         | 2.80E-19  | T      | -8.97634    |
| SPNS1   | 3.51E-09 | rs75556002  | 0.675961   | T      | C      | 0.0102      | -0.0096 | -0.0096 | rs75556002  | LloydJones_WHOLEBLOOD                      | 1.30E-14  | T      | 0.72673     |
| SPNS1   | 3.51E-09 | rs62035317  | 0.700585   | A      | G      | 0.0663      | 0.0042  | 0.0042  | rs62035317  | Zhernakova_WHOLEBLOOD-gene-primary         | 1.12E-11  | A      | 6.79046     |
| SPNS1   | 3.51E-09 | rs7498329   | 0.797214   | A      | C      | 0.7619      | -0.0016 | -0.0016 | rs7498329   | Westra_WHOLEBLOOD                          | 1.53E-35  | C      | -12.443     |
| SPNS1   | 3.51E-09 | rs7498329   | 0.797214   | A      | C      | 0.7619      | -0.0016 | -0.0016 | rs7498329   | LloydJones_WHOLEBLOOD                      | 4.60E-18  | C      | -0.286571   |
| SPNS1   | 3.51E-09 | rs7498329   | 0.797214   | A      | C      | 0.7619      | -0.0016 | -0.0016 | rs7498329   | Zhernakova_WHOLEBLOOD-gene-primary         | 2.26E-13  | C      | -7.33211    |
| SPNS1   | 3.51E-09 | rs7498329   | 0.797214   | A      | C      | 0.7619      | -0.0016 | -0.0016 | rs7498329   | Fehrmann_WHOLEBLOOD                        | 3.10E-12  | C      | -6.97       |
| SPNS1   | 3.51E-09 | rs8056259   | 0.894326   | T      | C      | 0.2857      | -0.0008 | -0.0008 | rs8056259   | LloydJones_WHOLEBLOOD                      | 2.50E-12  | T      | 0.206418    |
| SPNS1   | 3.51E-09 | rs112918513 | 0.992411   | A      | G      | 0.9099      | -0.0001 | -0.0001 | rs112918513 | Zhernakova_WHOLEBLOOD-gene-primary         | 7.39E-15  | G      | 7.77772     |
| SULT1A1 | 1.96E-07 | rs75539558  | 1.57E-06   | C      | G      | 0.6633      | 0.0250  | 0.0250  | rs75539558  | Zhernakova_WHOLEBLOOD-exonratio-primary    | 3.89E-160 | G      | 26.9642     |
| SULT1A1 | 1.96E-07 | rs75539558  | 1.57E-06   | C      | G      | 0.6633      | 0.0250  | 0.0250  | rs75539558  | Zhernakova_WHOLEBLOOD-gene-primary         | 2.32E-16  | G      | -8.20409    |
| SULT1A1 | 1.96E-07 | rs75539558  | 1.57E-06   | C      | G      | 0.6633      | 0.0250  | 0.0250  | rs75539558  | GTE_WHOLEBLOOD                             | 1.14E-12  | G      | -0.355971   |
| SULT1A1 | 1.96E-07 | rs75539558  | 1.57E-06   | C      | G      | 0.6633      | 0.0250  | 0.0250  | rs75539558  | GTE_SKIN                                   | 1.06E-10  | G      | -0.369911   |
| SULT1A1 | 1.96E-07 | rs231970    | 4.84E-06   | A      | G      | 0.8827      | -0.0350 | -0.0350 | rs231970    | LloydJones_WHOLEBLOOD                      | 8.30E-25  | G      | -0.4597     |
| SULT1A1 | 1.96E-07 | rs231970    | 4.84E-06   | A      | G      | 0.8827      | -0.0350 | -0.0350 | rs231970    | Zhernakova_WHOLEBLOOD-gene-primary         | 3.38E-16  | G      | -8.15887    |
| SULT1A1 | 1.96E-07 | rs4788119   | 0.0205086  | T      | G      | 0.8112      | 0.0149  | 0.0149  | rs4788119   | LloydJones_WHOLEBLOOD                      | 4.60E-18  | G      | -0.288976   |
| SULT1A1 | 1.96E-07 | rs79476281  | 0.0875464  | T      | C      | 0.0527      | -0.0218 | -0.0218 | rs150089402 | Zhernakova_WHOLEBLOOD-gene-contextspecific | 6.54E-13  | T      | -7.18876    |
| SULT1A1 | 1.96E-07 | rs79476281  | 0.0875464  | T      | C      | 0.0527      | -0.0218 | -0.0218 | rs150089402 | Zhernakova_WHOLEBLOOD-exon-primary         | 7.26E-13  | T      | -7.17432    |
| SULT1A1 | 1.96E-07 | rs79476281  | 0.0875464  | T      | C      | 0.0527      | -0.0218 | -0.0218 | rs150089402 | Zhernakova_WHOLEBLOOD-exon-primary         | 9.51E-12  | T      | -6.81362    |
| SULT1A1 | 1.96E-07 | rs4788115   | 0.122264   | A      | T      | 0.2160      | 0.0112  | 0.0112  | rs4788115   | LloydJones_WHOLEBLOOD                      | 4.10E-12  | A      | 0.242542    |
| SULT1A1 | 1.96E-07 | rs75227850  | 0.159471   | T      | C      | 0.0238      | -0.0191 | -0.0191 | rs75227850  | LloydJones_WHOLEBLOOD                      | 3.30E-16  | T      | -0.610833   |
| SULT1A1 | 1.96E-07 | rs11540497  | 0.161972   | A      | G      | 0.0493      | -0.0197 | -0.0197 | rs11540497  | LloydJones_WHOLEBLOOD                      | 1.50E-10  | A      | -0.390543   |
| SULT1A1 | 1.96E-07 | rs12935321  | 0.533018   | A      | G      | 0.1224      | 0.0063  | 0.0063  | rs12445519  | Zhernakova_WHOLEBLOOD-gene-primary         | 1.65E-29  | G      | 11.2798     |
| SULT1A1 | 1.96E-07 | rs12935321  | 0.533018   | A      | G      | 0.1224      | 0.0063  | 0.0063  | rs12445519  | LloydJones_WHOLEBLOOD                      | 1.20E-10  | G      | 0.318144    |
| TICAM2  | 1.67E-06 | rs17137937  | 2.93E-06   | T      | C      | 0.0748      | 0.0425  | 0.0425  | rs17137937  | Hao_LUNG                                   | 0         | C      | -8.88       |
| TICAM2  | 1.67E-06 | rs17137937  | 2.93E-06   | T      | C      | 0.0748      | 0.0425  | 0.0425  | rs17137937  | Westra_WHOLEBLOOD                          | 3.67E-20  | T      | 9.19745     |
| TICAM2  | 1.67E-06 | rs17137937  | 2.93E-06   | T      | C      | 0.0748      | 0.0425  | 0.0425  | rs17137937  | LloydJones_WHOLEBLOOD                      | 5.70E-10  | T      | 0.303195    |
| TICAM2  | 1.67E-06 | rs256938    | 0.00238245 | A      | C      | 0.5646      | 0.0152  | 0.0152  | rs256938    | Fairfax_MONOCYTES-NAIVE                    | 2.06E-09  | NA     | -9          |
| TICAM2  | 1.67E-06 | rs2546480   | 0.223513   | T      | C      | 0.5527      | -0.0061 | -0.0061 | rs2546480   | Fairfax_MONOCYTES-IFN                      | 3.12E-10  | NA     | -9          |
| TMEM236 | 1.92E-06 | rs7092926   | 6.75E-07   | T      | G      | 0.4320      | 0.0259  | 0.0259  | rs7092926   | Zhernakova_WHOLEBLOOD-gene-primary         | 1.51E-26  | T      | -10.6634    |
| TMEM236 | 1.92E-06 | rs7092926   | 6.75E-07   | T      | G      | 0.4320      | 0.0259  | 0.0259  | rs7092926   | Zhernakova_WHOLEBLOOD-gene-contextspecific | 1.51E-26  | T      | -10.6634    |
| TMEM236 | 1.92E-06 | rs7092926   | 6.75E-07   | T      | G      | 0.4320      | 0.0259  | 0.0259  | rs7092926   | Zhernakova_WHOLEBLOOD-exon-primary         | 4.45E-25  | T      | -10.3442    |
| TMEM236 | 1.92E-06 | rs55999004  | 0.00597318 | A      | T      | 0.1378      | -0.0174 | -0.0174 | rs55999004  | Zhernakova_WHOLEBLOOD-gene-primary         | 2.17E-10  | A      | 6.34864     |
| TMEM236 | 1.92E-06 | rs45607131  | 0.0445172  | T      | C      | 0.0697      | 0.0178  | 0.0178  | rs45607131  | Zhernakova_WHOLEBLOOD-gene-primary         | 2.40E-11  | T      | -6.67946    |
| VPRBP   | 1.41E-07 | rs73078636  | 1.41E-07   | A      | G      | 0.1480      | -0.0403 | -0.0403 | rs73078636  | Zhernakova_WHOLEBLOOD-exon-primary         | 2.14E-52  | A      | 15.233      |
| VPRBP   | 1.41E-07 | rs73078636  | 1.41E-07   | A      | G      | 0.1480      | -0.0403 | -0.0403 | rs73078636  | Zhernakova_WHOLEBLOOD-gene-contextspecific | 2.08E-44  | A      | 13.9794     |
| VPRBP   | 1.41E-07 | rs73078636  | 1.41E-07   | A      | G      | 0.1480      | -0.0403 | -0.0403 | rs73078636  | Zhernakova_WHOLEBLOOD-gene-primary         | 2.08E-44  | A      | 13.9794     |

\* If the same eQTL appears more than once for the same gene-study-tissue combination, it indicates that the SNP was tested for association with, for example, multiple exons (RNA-seq) or multiple probes (microarray data) of the same gene.

**Table E5. Summary of the directional effect of the allergy-protective allele on gene expression, across all disease-associated eQTL of a given gene.**

| Gene                                                    | eQTL study   |                                 | N eQTL tested | N eQTL with P<0.05 in adjusted allergic disease GWAS |                                                         |           |               |  |
|---------------------------------------------------------|--------------|---------------------------------|---------------|------------------------------------------------------|---------------------------------------------------------|-----------|---------------|--|
|                                                         | First author | Tissue                          |               | Total                                                | Effect of allergy-protective allele on gene expression: |           |               |  |
|                                                         |              |                                 |               |                                                      | Decreased                                               | Increased | Not available |  |
| <i>20 genes with replication gene-based P&lt;0.0016</i> |              |                                 |               |                                                      |                                                         |           |               |  |
| <i>ABO</i>                                              | GTE          | LUNG                            | 1             | 0                                                    | 0                                                       | 0         | 0             |  |
| <i>ABO</i>                                              | GTE          | SKIN                            | 1             | 0                                                    | 0                                                       | 0         | 0             |  |
| <i>ABO</i>                                              | GTE          | WHOLEBLOOD                      | 1             | 1                                                    | 0                                                       | 1         | 0             |  |
| <i>ABO</i>                                              | Hao          | LUNG                            | 2             | 0                                                    | 0                                                       | 0         | 0             |  |
| <i>ABO</i>                                              | Yao          | WHOLEBLOOD                      | 1             | 1                                                    | 0                                                       | 1         | 0             |  |
| <i>ABO</i>                                              | Zhernakova   | WHOLEBLOOD-exon-primary         | 1             | 1                                                    | 0                                                       | 1         | 0             |  |
| <i>ABO</i>                                              | Zhernakova   | WHOLEBLOOD-exonratio-primary    | 1             | 1                                                    | 0                                                       | 1         | 0             |  |
| <i>ABO</i>                                              | Zhernakova   | WHOLEBLOOD-gene-contextspecific | 2             | 1                                                    | 0                                                       | 1         | 0             |  |
| <i>ABO</i>                                              | Zhernakova   | WHOLEBLOOD-gene-primary         | 12            | 5                                                    | 0                                                       | 5         | 0             |  |
| <i>AC004893.11</i>                                      | Zhernakova   | WHOLEBLOOD-exon-primary         | 1             | 1                                                    | 1                                                       | 0         | 0             |  |
| <i>AC004893.11</i>                                      | Zhernakova   | WHOLEBLOOD-gene-contextspecific | 1             | 1                                                    | 1                                                       | 0         | 0             |  |
| <i>AC004893.11</i>                                      | Zhernakova   | WHOLEBLOOD-gene-primary         | 1             | 1                                                    | 1                                                       | 0         | 0             |  |
| <i>APOBR</i>                                            | LloydJones   | WHOLEBLOOD                      | 1             | 1                                                    | 0                                                       | 1         | 0             |  |
| <i>APOBR</i>                                            | Zhernakova   | WHOLEBLOOD-exon-primary         | 1             | 1                                                    | 0                                                       | 1         | 0             |  |
| <i>APOBR</i>                                            | Zhernakova   | WHOLEBLOOD-gene-contextspecific | 1             | 1                                                    | 0                                                       | 1         | 0             |  |
| <i>APOBR</i>                                            | Zhernakova   | WHOLEBLOOD-gene-primary         | 1             | 1                                                    | 0                                                       | 1         | 0             |  |
| <i>ATXN2L</i>                                           | Zhernakova   | WHOLEBLOOD-exon-primary         | 1             | 1                                                    | 1                                                       | 0         | 0             |  |
| <i>ATXN2L</i>                                           | Zhernakova   | WHOLEBLOOD-gene-contextspecific | 1             | 1                                                    | 1                                                       | 0         | 0             |  |
| <i>ATXN2L</i>                                           | Zhernakova   | WHOLEBLOOD-gene-primary         | 1             | 1                                                    | 1                                                       | 0         | 0             |  |
| <i>FOSL2</i>                                            | Walsh        | WHOLEBLOOD                      | 1             | 1                                                    | 0                                                       | 1         | 0             |  |
| <i>FOSL2</i>                                            | Zhernakova   | WHOLEBLOOD-exonratio-primary    | 1             | 1                                                    | 0                                                       | 1         | 0             |  |
| <i>IL27</i>                                             | Zhernakova   | WHOLEBLOOD-exon-primary         | 1             | 1                                                    | 0                                                       | 1         | 0             |  |
| <i>IL27</i>                                             | Zhernakova   | WHOLEBLOOD-gene-contextspecific | 1             | 1                                                    | 0                                                       | 1         | 0             |  |
| <i>IL27</i>                                             | Zhernakova   | WHOLEBLOOD-gene-primary         | 2             | 2                                                    | 0                                                       | 2         | 0             |  |
| <i>IPCEF1</i>                                           | Battle       | WHOLEBLOOD                      | 1             | 1                                                    | 0                                                       | 0         | 1             |  |
| <i>IPCEF1</i>                                           | GTE          | SKIN                            | 1             | 0                                                    | 0                                                       | 0         | 0             |  |
| <i>IPCEF1</i>                                           | Zhernakova   | WHOLEBLOOD-exon-primary         | 2             | 2                                                    | 1                                                       | 1         | 0             |  |
| <i>IPCEF1</i>                                           | Zhernakova   | WHOLEBLOOD-exonratio-primary    | 1             | 1                                                    | 1                                                       | 0         | 0             |  |
| <i>IPCEF1</i>                                           | Zhernakova   | WHOLEBLOOD-gene-contextspecific | 1             | 1                                                    | 0                                                       | 1         | 0             |  |
| <i>IPCEF1</i>                                           | Zhernakova   | WHOLEBLOOD-gene-primary         | 2             | 2                                                    | 0                                                       | 2         | 0             |  |
| <i>LAT</i>                                              | Fehrmann     | WHOLEBLOOD                      | 2             | 2                                                    | 0                                                       | 1         | 1             |  |
| <i>LAT</i>                                              | Zhernakova   | WHOLEBLOOD-exon-primary         | 1             | 0                                                    | 0                                                       | 0         | 0             |  |
| <i>LAT</i>                                              | Zhernakova   | WHOLEBLOOD-gene-primary         | 2             | 1                                                    | 0                                                       | 1         | 0             |  |

|               |            |                                 |   |   |   |   |   |
|---------------|------------|---------------------------------|---|---|---|---|---|
| <i>NCF4</i>   | Fairfax    | MONOCYTES-LPS24                 | 2 | 1 | 0 | 0 | 1 |
| <i>NCF4</i>   | Kasela     | CD4TCELLS                       | 1 | 0 | 0 | 0 | 0 |
| <i>NCF4</i>   | LloydJones | WHOLEBLOOD                      | 1 | 1 | 0 | 1 | 0 |
| <i>NCF4</i>   | Quach      | MONOCYTES-baseline              | 1 | 1 | 0 | 0 | 1 |
| <i>NCF4</i>   | Raj        | CD4TCELLS                       | 3 | 1 | 0 | 0 | 1 |
| <i>NCF4</i>   | Raj        | MONOCYTES                       | 1 | 1 | 0 | 0 | 1 |
| <i>NCF4</i>   | Westra     | WHOLEBLOOD                      | 4 | 2 | 0 | 2 | 0 |
| <i>NCF4</i>   | Zeller     | MONOCYTES                       | 1 | 1 | 0 | 0 | 1 |
| <i>NCF4</i>   | Zhernakova | WHOLEBLOOD-gene-primary         | 1 | 1 | 0 | 1 | 0 |
| <i>NSMCE1</i> | LloydJones | WHOLEBLOOD                      | 1 | 1 | 1 | 0 | 0 |
| <i>NSMCE1</i> | Nedelec    | MACROPHAGES-baseline-asQTL      | 1 | 1 | 0 | 0 | 1 |
| <i>NSMCE1</i> | Nedelec    | MACROPHAGES-listeria-asQTL      | 1 | 1 | 0 | 0 | 1 |
| <i>NSMCE1</i> | Zeller     | MONOCYTES                       | 1 | 1 | 0 | 0 | 1 |
| <i>OR10J5</i> | Westra     | WHOLEBLOOD                      | 3 | 3 | 0 | 3 | 0 |
| <i>PRR5L</i>  | LloydJones | WHOLEBLOOD                      | 1 | 1 | 0 | 1 | 0 |
| <i>PRR5L</i>  | Zhernakova | WHOLEBLOOD-exon-primary         | 5 | 1 | 0 | 1 | 0 |
| <i>PRR5L</i>  | Zhernakova | WHOLEBLOOD-exonratio-primary    | 2 | 0 | 0 | 0 | 0 |
| <i>PRR5L</i>  | Zhernakova | WHOLEBLOOD-gene-contextspecific | 2 | 1 | 0 | 1 | 0 |
| <i>PRR5L</i>  | Zhernakova | WHOLEBLOOD-gene-primary         | 3 | 1 | 0 | 1 | 0 |
| <i>PVALB</i>  | Battle     | WHOLEBLOOD                      | 1 | 1 | 0 | 0 | 1 |
| <i>PVALB</i>  | Battle     | WHOLEBLOOD-ase                  | 1 | 1 | 0 | 0 | 1 |
| <i>PVALB</i>  | Davenport  | LEUCOCYTES                      | 1 | 1 | 0 | 0 | 1 |
| <i>PVALB</i>  | Dinarzo    | WHOLEBLOOD                      | 1 | 1 | 0 | 1 | 0 |
| <i>PVALB</i>  | Fairfax    | MONOCYTES-LPS24                 | 1 | 0 | 0 | 0 | 0 |
| <i>PVALB</i>  | Fehrmann   | WHOLEBLOOD                      | 1 | 1 | 0 | 1 | 0 |
| <i>PVALB</i>  | GTE        | WHOLEBLOOD                      | 1 | 1 | 0 | 1 | 0 |
| <i>PVALB</i>  | Jansen     | WHOLEBLOOD                      | 1 | 1 | 0 | 1 | 0 |
| <i>PVALB</i>  | LloydJones | WHOLEBLOOD                      | 4 | 2 | 0 | 2 | 0 |
| <i>PVALB</i>  | Walsh      | WHOLEBLOOD                      | 2 | 2 | 0 | 2 | 0 |
| <i>PVALB</i>  | Zeller     | MONOCYTES                       | 1 | 1 | 0 | 0 | 1 |
| <i>PVALB</i>  | Zhernakova | WHOLEBLOOD-exon-primary         | 2 | 1 | 0 | 1 | 0 |
| <i>PVALB</i>  | Zhernakova | WHOLEBLOOD-exonratio-primary    | 1 | 1 | 0 | 1 | 0 |
| <i>PVALB</i>  | Zhernakova | WHOLEBLOOD-gene-contextspecific | 2 | 1 | 0 | 1 | 0 |
| <i>PVALB</i>  | Zhernakova | WHOLEBLOOD-gene-primary         | 4 | 2 | 0 | 2 | 0 |
| <i>PVALB</i>  | Zhernakova | WHOLEBLOOD-polyAratio-primary   | 1 | 1 | 0 | 1 | 0 |
| <i>RBM15B</i> | Jansen     | WHOLEBLOOD                      | 1 | 1 | 0 | 1 | 0 |
| <i>RBM15B</i> | Zhernakova | WHOLEBLOOD-exon-primary         | 1 | 1 | 0 | 1 | 0 |
| <i>RBM15B</i> | Zhernakova | WHOLEBLOOD-gene-contextspecific | 1 | 1 | 0 | 1 | 0 |
| <i>RBM15B</i> | Zhernakova | WHOLEBLOOD-gene-primary         | 1 | 1 | 0 | 1 | 0 |



|                      |            |                                 |    |   |   |   |   |
|----------------------|------------|---------------------------------|----|---|---|---|---|
| <i>RP11-24N18.1</i>  | Zhernakova | WHOLEBLOOD-exon-primary         | 1  | 1 | 1 | 0 | 0 |
| <i>RP11-24N18.1</i>  | Zhernakova | WHOLEBLOOD-gene-contextspecific | 1  | 1 | 1 | 0 | 0 |
| <i>RP11-24N18.1</i>  | Zhernakova | WHOLEBLOOD-gene-primary         | 1  | 1 | 1 | 0 | 0 |
| <i>RP11-264B17.4</i> | Zhernakova | WHOLEBLOOD-exon-primary         | 1  | 1 | 0 | 1 | 0 |
| <i>RP11-264B17.4</i> | Zhernakova | WHOLEBLOOD-gene-contextspecific | 1  | 1 | 0 | 1 | 0 |
| <i>RP11-264B17.4</i> | Zhernakova | WHOLEBLOOD-gene-primary         | 3  | 2 | 0 | 2 | 0 |
| <i>RP11-534L20.5</i> | GTE        | FIBROBLASTS                     | 1  | 1 | 0 | 1 | 0 |
| <i>RP11-534L20.5</i> | GTE        | LUNG                            | 1  | 1 | 0 | 1 | 0 |
| <i>RP11-534L20.5</i> | GTE        | SKIN                            | 1  | 1 | 0 | 1 | 0 |
| <i>RP11-534L20.5</i> | GTE        | WHOLEBLOOD                      | 1  | 1 | 0 | 1 | 0 |
| <i>RP11-534L20.5</i> | Kasela     | CD4TCELLS                       | 4  | 3 | 0 | 3 | 0 |
| <i>RP11-534L20.5</i> | Kasela     | CD8TCELLS                       | 5  | 3 | 0 | 3 | 0 |
| <i>RP11-534L20.5</i> | Walsh      | WHOLEBLOOD                      | 2  | 1 | 0 | 1 | 0 |
| <i>RP11-534L20.5</i> | Zhernakova | WHOLEBLOOD-gene-primary         | 12 | 5 | 0 | 5 | 0 |
| <i>SPNS1</i>         | Battle     | WHOLEBLOOD                      | 1  | 1 | 0 | 0 | 1 |
| <i>SPNS1</i>         | Davenport  | LEUCOCYTES                      | 1  | 1 | 0 | 0 | 1 |
| <i>SPNS1</i>         | Dixon      | LCLS                            | 1  | 1 | 1 | 0 | 0 |
| <i>SPNS1</i>         | Fairfax    | MONOCYTES-LPS24                 | 1  | 1 | 0 | 0 | 1 |
| <i>SPNS1</i>         | Fehrmann   | WHOLEBLOOD                      | 2  | 1 | 0 | 0 | 1 |
| <i>SPNS1</i>         | Geuvadis   | LCLS                            | 1  | 1 | 0 | 0 | 1 |
| <i>SPNS1</i>         | Grundberg  | LCLS                            | 2  | 1 | 0 | 1 | 0 |
| <i>SPNS1</i>         | GTE        | LCLS                            | 1  | 1 | 0 | 1 | 0 |
| <i>SPNS1</i>         | GTE        | WHOLEBLOOD                      | 1  | 1 | 0 | 1 | 0 |
| <i>SPNS1</i>         | Kim        | MONOCYTES-Baseline              | 1  | 1 | 0 | 0 | 1 |
| <i>SPNS1</i>         | Kim        | MONOCYTES-LPS                   | 1  | 1 | 0 | 0 | 1 |
| <i>SPNS1</i>         | LloydJones | WHOLEBLOOD                      | 12 | 6 | 0 | 6 | 0 |
| <i>SPNS1</i>         | Raj        | CD4TCELLS                       | 1  | 1 | 0 | 0 | 1 |
| <i>SPNS1</i>         | Raj        | MONOCYTES                       | 1  | 1 | 0 | 0 | 1 |
| <i>SPNS1</i>         | Westra     | WHOLEBLOOD                      | 4  | 2 | 0 | 2 | 0 |
| <i>SPNS1</i>         | Zeller     | MONOCYTES                       | 2  | 1 | 0 | 0 | 1 |
| <i>SPNS1</i>         | Zhernakova | WHOLEBLOOD-exon-primary         | 1  | 1 | 0 | 1 | 0 |
| <i>SPNS1</i>         | Zhernakova | WHOLEBLOOD-gene-contextspecific | 1  | 1 | 0 | 1 | 0 |
| <i>SPNS1</i>         | Zhernakova | WHOLEBLOOD-gene-primary         | 9  | 3 | 0 | 3 | 0 |
| <i>SULT1A1</i>       | GTE        | SKIN                            | 1  | 1 | 1 | 0 | 0 |
| <i>SULT1A1</i>       | GTE        | WHOLEBLOOD                      | 1  | 1 | 1 | 0 | 0 |
| <i>SULT1A1</i>       | LloydJones | WHOLEBLOOD                      | 6  | 2 | 1 | 1 | 0 |
| <i>SULT1A1</i>       | Zhernakova | WHOLEBLOOD-exon-primary         | 1  | 0 | 0 | 0 | 0 |
| <i>SULT1A1</i>       | Zhernakova | WHOLEBLOOD-exonratio-primary    | 1  | 1 | 0 | 1 | 0 |
| <i>SULT1A1</i>       | Zhernakova | WHOLEBLOOD-gene-contextspecific | 1  | 0 | 0 | 0 | 0 |

|                                                                |            |                                 |   |   |   |   |   |
|----------------------------------------------------------------|------------|---------------------------------|---|---|---|---|---|
| <i>SULT1A1</i>                                                 | Zhernakova | WHOLEBLOOD-gene-primary         | 3 | 2 | 1 | 1 | 0 |
| <i>VPRBP</i>                                                   | Zhernakova | WHOLEBLOOD-exon-primary         | 1 | 1 | 0 | 1 | 0 |
| <i>VPRBP</i>                                                   | Zhernakova | WHOLEBLOOD-gene-contextspecific | 1 | 1 | 0 | 1 | 0 |
| <i>VPRBP</i>                                                   | Zhernakova | WHOLEBLOOD-gene-primary         | 1 | 1 | 0 | 1 | 0 |
| <i>3 genes with replication gene-based 0.0016&lt;P&lt;0.05</i> |            |                                 |   |   |   |   |   |
| CASZ1                                                          | Kim        | MONOCYTES-Baseline              | 1 | 1 | 0 | 0 | 1 |
| CASZ1                                                          | Kim        | MONOCYTES-LPS                   | 1 | 1 | 0 | 0 | 1 |
| CASZ1                                                          | LloydJones | WHOLEBLOOD                      | 1 | 0 | 0 | 0 | 0 |
| CASZ1                                                          | Zhernakova | WHOLEBLOOD-exonratio-primary    | 1 | 0 | 0 | 0 | 0 |
| FPR1                                                           | Battle     | WHOLEBLOOD-ase                  | 1 | 0 | 0 | 0 | 0 |
| FPR1                                                           | GTE        | FIBROBLASTS                     | 1 | 0 | 0 | 0 | 0 |
| FPR1                                                           | GTE        | WHOLEBLOOD                      | 1 | 1 | 0 | 1 | 0 |
| FPR1                                                           | Hao        | LUNG                            | 1 | 1 | 0 | 1 | 0 |
| FPR1                                                           | LloydJones | WHOLEBLOOD                      | 7 | 3 | 0 | 3 | 0 |
| FPR1                                                           | Walsh      | WHOLEBLOOD                      | 2 | 1 | 0 | 1 | 0 |
| FPR1                                                           | Westra     | WHOLEBLOOD                      | 6 | 3 | 0 | 3 | 0 |
| FPR1                                                           | Zeller     | MONOCYTES                       | 1 | 1 | 0 | 0 | 1 |
| FPR1                                                           | Zhernakova | WHOLEBLOOD-exon-primary         | 3 | 1 | 0 | 1 | 0 |
| FPR1                                                           | Zhernakova | WHOLEBLOOD-exonratio-primary    | 1 | 0 | 0 | 0 | 0 |
| FPR1                                                           | Zhernakova | WHOLEBLOOD-gene-primary         | 7 | 6 | 0 | 6 | 0 |
| TICAM2                                                         | Fairfax    | MONOCYTES-IFN                   | 1 | 0 | 0 | 0 | 0 |
| TICAM2                                                         | Fairfax    | MONOCYTES-NAIVE                 | 1 | 1 | 0 | 0 | 1 |
| TICAM2                                                         | Hao        | LUNG                            | 1 | 1 | 1 | 0 | 0 |
| TICAM2                                                         | LloydJones | WHOLEBLOOD                      | 1 | 1 | 1 | 0 | 0 |
| TICAM2                                                         | Westra     | WHOLEBLOOD                      | 1 | 1 | 1 | 0 | 0 |

**Table E6. Results (i.e. EUGENE P-value) from gene-based association analyses of three case-only phenotypes comparing three non-overlapping groups of adults: (1) asthma only cases (n=12,268) versus hay fever only cases (n=33,305); (2) asthma only cases (n=12,268) versus eczema only cases (n=6,276); and (3) hay fever only cases (n=33,305) versus eczema only cases (n=6,276).**

| Gene                 | Chr | BP (start) | (1) Asthma vs Hay fever | (2) Asthma vs Eczema | (3) Hay fever vs Eczema |
|----------------------|-----|------------|-------------------------|----------------------|-------------------------|
| <i>OR10J5</i>        | 1   | 159504793  | 0.0074                  | 0.6664               | 0.3608                  |
| <i>RP11-534L20.5</i> | 1   | 206677281  | 0.5574                  | 0.2689               | 0.6935                  |
| <i>FOSL2</i>         | 2   | 28615315   | 0.2191                  | 0.1755               | 0.1056                  |
| <i>RBM15B</i>        | 3   | 51428731   | 0.3264                  | 0.9377               | 0.1260                  |
| <i>VPRBP</i>         | 3   | 51433298   | 0.3264                  | 0.9377               | 0.1260                  |
| <i>IPCEF1</i>        | 6   | 154475631  | 0.2120                  | 0.8854               | 0.6763                  |
| <i>AC004893.11</i>   | 7   | 98610788   | 0.9747                  | 0.8107               | 0.8938                  |
| <i>ABO</i>           | 9   | 136125788  | 0.6017                  | 0.2920               | 0.7406                  |
| <i>PRR5L</i>         | 11  | 36317838   | 0.0911                  | 0.3894               | 0.8578                  |
| <i>NSMCE1</i>        | 16  | 27236312   | 0.6497                  | 0.7415               | 0.2882                  |
| <i>APOBR</i>         | 16  | 28505970   | 0.2789                  | 0.9077               | 0.4636                  |
| <i>IL27</i>          | 16  | 28510683   | 0.4716                  | 0.9111               | 0.3380                  |
| <i>SULT1A1</i>       | 16  | 28616903   | 0.1836                  | 0.9831               | 0.3116                  |
| <i>ATXN2L</i>        | 16  | 28834356   | 0.2188                  | 0.9266               | 0.1121                  |
| <i>RP11-24N18.1</i>  | 16  | 28841933   | 0.2188                  | 0.9266               | 0.1121                  |
| <i>SPNS1</i>         | 16  | 28985542   | 0.4876                  | 0.5549               | 0.2796                  |
| <i>RP11-264B17.4</i> | 16  | 28986294   | 0.5000                  | 0.3676               | 0.0202                  |
| <i>LAT</i>           | 16  | 28996147   | 0.3288                  | 0.5084               | 0.0163                  |
| <i>PVALB</i>         | 22  | 37196728   | 0.4415                  | 0.2531               | 0.3182                  |
| <i>NCF4</i>          | 22  | 37257030   | 0.8812                  | 0.8216               | 0.6894                  |

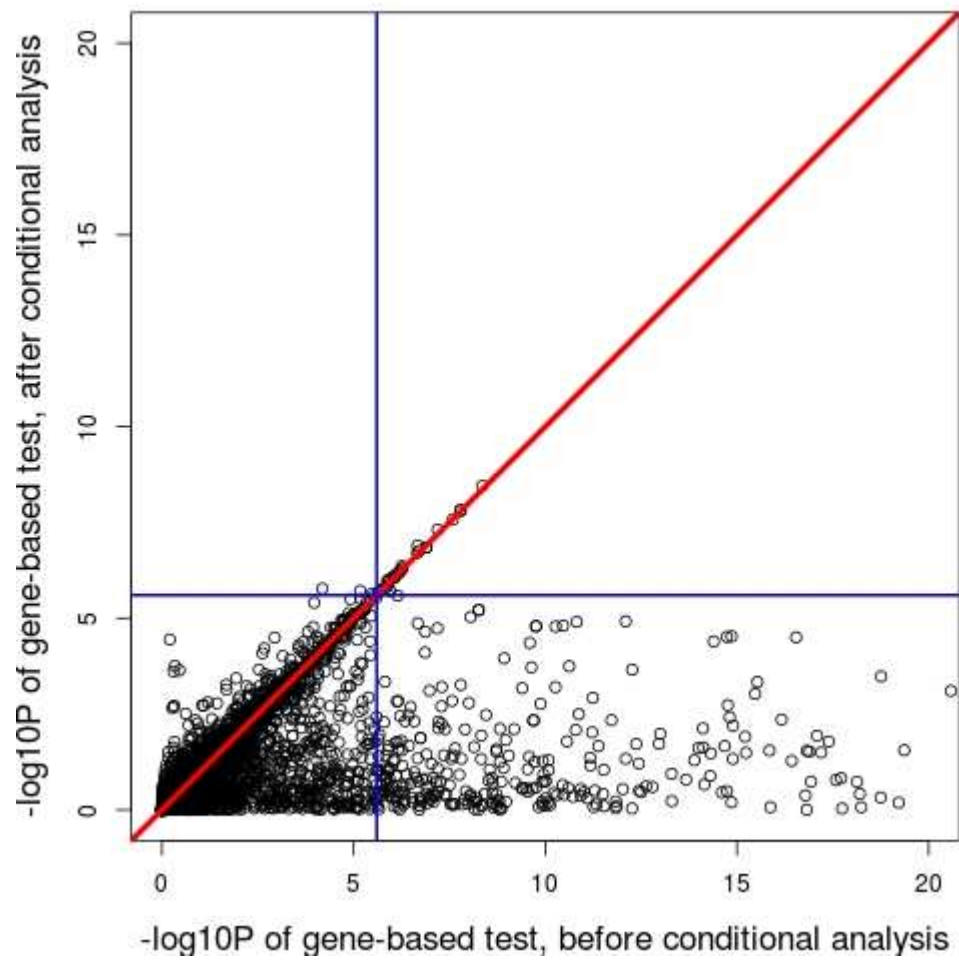

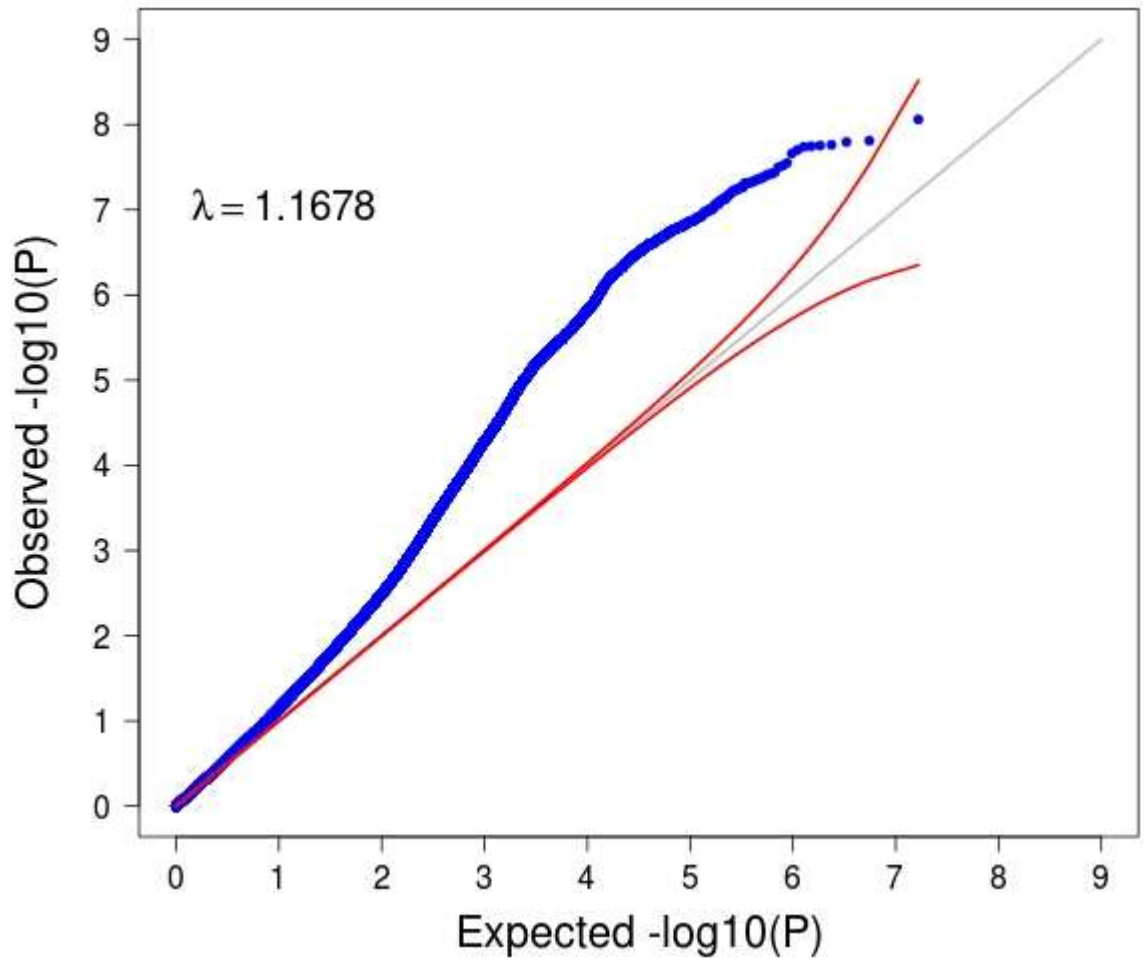

1 **Eleven loci with new reproducible genetic associations with allergic disease risk**

2  
3 **ONLINE REPOSITORY**

4  
5 Manuel AR Ferreira, PhD<sup>1</sup>, Judith M Vonk, PhD<sup>2</sup>, Hansjörg Baurecht, PhD<sup>3</sup>, Ingo Marenholz, PhD<sup>4,5</sup>,  
6 Chao Tian, PhD<sup>6</sup>, Joshua D Hoffman, PhD<sup>7</sup>, Quinta Helmer, PhD<sup>8</sup>, Annika Tillander, PhD<sup>9</sup>,  
7 Vilhelmina Ullemar, PhD<sup>9</sup>, Yi Lu, PhD<sup>9</sup>, Franz Rüschen-dorf, PhD<sup>4</sup>, the 23andMe Research Team<sup>6</sup>,  
8 collaborators of the SHARE study<sup>10</sup>, David A Hinds, PhD<sup>6</sup>, Norbert Hübner, MD<sup>4</sup>, Stephan Weidinger,  
9 MD<sup>3</sup>, Patrik KE Magnusson, PhD<sup>9</sup>, Eric Jorgenson, PhD<sup>11</sup>, Young-Ae Lee, MD<sup>4,5</sup>, Dorret I Boomsma,  
10 PhD<sup>8</sup>, Robert Karlsson, PhD<sup>9</sup>, Catarina Almqvist, MD<sup>9,12</sup>, Gerard H Koppelman, MD<sup>13</sup> and Lavinia  
11 Paternoster, PhD<sup>14</sup>

13 **E Tables**

14 Tables E1 to E5 are provided in a separate Excel workbook.

15

16 **Rationale for performing the conditional analysis prior to the gene-based analysis**

17 The goal of our gene-based analysis was to identify genes with a significant association with allergic  
18 disease risk that was not driven by the 136 sentinel allergy risk SNPs reported by Ferreira et al. <sup>1</sup>. In  
19 practice, applying the gene-based test to the original results of Ferreira et al. <sup>1</sup> (i.e. before conditional  
20 analysis) would not be the best way to achieve that goal. Had we done so, there would be hundreds  
21 (exactly 362) of genes with a significant association at the genome-wide significance threshold of  
22  $P < 2.5 \times 10^{-6}$  (Figure E2). Most of the 362 genes are located in close proximity to (<1 Mb) the 136  
23 sentinel allergy risk SNPs that we reported by Ferreira et al. <sup>1</sup>, and so the observed gene-based  
24 associations are very likely to be driven by those known allergy risk SNPs. As indicated above, the goal  
25 of our analysis was not to identify such genes, but instead those with a gene-based association driven  
26 by potentially new allergy risk SNPs.

27

28 To do so, we could have simply filtered out genes that were located “close” to the 136 sentinel risk  
29 SNPs reported by Ferreira et al. <sup>1</sup>. But that is not an ideal approach, because LD patterns are not  
30 uniform throughout the genome, with substantial LD between variants found at distances of >1 Mb in  
31 some regions <sup>2</sup>. So if we had defined “close” as <1 Mb from a sentinel variant, then we could  
32 potentially fail to filter out genes located at a greater distance but still with an association driven by a  
33 known allergy risk SNP. Conversely, had we used a distance threshold that would ensure linkage  
34 equilibrium across the genome between the Ferreira et al. <sup>1</sup> sentinel risk SNPs and eQTL (e.g. >10 Mb),  
35 we would potentially encounter the opposite problem, and filter out genes with an association not  
36 driven by a known allergy risk SNP.

37

38 Another approach could have been to remove results for the 136 sentinel risk SNPs (and for any other  
39 variants in LD with those) from the Ferreira et al. <sup>1</sup> GWAS. Then apply the gene-based test after those



40 exclusions. In our view, this is more appropriate than the “distance-based” approach described above,  
41 but still not ideal, because it requires defining a threshold to identify variants in LD with the sentinel  
42 risk SNPs. Should this be an  $r^2$  of 0.10, 0.05, or 0.01? The threshold selected could in practice turn out  
43 to be too liberal or too conservative.

44

45 Instead of the distance- or LD-based filtering approaches described above, we argue that a more  
46 efficient (and still simple and robust) approach to identify genes with an association not driven by a  
47 sentinel risk SNP identified in Ferreira et al. <sup>1</sup>, is to first adjust the single-SNP results of that GWAS for  
48 the effects of the sentinel risk SNPs identified in that GWAS. Then apply the gene-based test to the  
49 adjusted GWAS results. Approximate conditional association analysis can be (and was in our study)  
50 performed with the GCTA tool <sup>2</sup>, requiring only summary statistics from the GWAS and genotype data  
51 from individuals with an ancestry that is representative of the studies that were included in the GWAS  
52 (we used 5,000 Europeans from the UK Biobank).

53

54 In practice, the  $P$ -value for any variant located  $>10$  Mb from a sentinel risk SNP is the same before and  
55 after the conditional analysis performed with GCTA, because both variants are considered to be in  
56 linkage equilibrium. For variants located  $<10$  Mb from a sentinel variant, the  $P$ -value after the  
57 conditional analysis in GCTA will be attenuated if in (and in proportion to the) LD with the nearby  
58 sentinel risk SNP(s). At one extreme (when  $r^2=0$ ), the  $P$ -value will be (almost if not) identical before  
59 and after conditional analysis. On the other hand, if the  $r^2$  between the test variant and the sentinel  
60 variant is 1, then the  $P$ -value after conditioning on the sentinel variant will be 1 (or very close to).

61

62 When we applied the gene-based test to the adjusted GWAS results, we identified 30 genes with a  
63  $P < 2.5 \times 10^{-6}$ . For most of these genes, the gene-based  $P$ -value obtained with the original GWAS results

64 (i.e. prior to the conditional analysis) was virtually unchanged (see Figure E2), confirming that the  
65 conditional analysis had not introduced biases that affected our results.

66

67 Regarding the observed inflation of test statistics after the conditional analysis (lambda of 1.17), it is  
68 important to note that lambda was greater (1.19) in our original GWAS<sup>1</sup> (i.e. prior to the conditional  
69 analysis). Therefore, the conditional analysis did not cause a systematic inflation of test statistics. We  
70 showed in Ferreira et al. <sup>1</sup> that most of this inflation is likely to reflect the polygenic nature of allergic  
71 disease risk and the large sample size used, which results in many thousands of SNPs being truly  
72 associated with disease risk (which increases lambda). This is likely to be the case because the inflation  
73 due to technical biases was only 1.04 (intercept from LD score regression analysis <sup>2</sup>). The Ferreira et al.  
74 GWAS results were adjusted by this inflation prior to the gene-based analysis reported in our current  
75 study.

76

77 **Collaborators of the SHARE study**

78

79 Jorge Esparza-Gordillo<sup>1,2,3</sup>, Oliver Hummel<sup>1</sup>, Sarah Grosche<sup>1,2</sup>, John S Witte<sup>4</sup>, Jouke-Jan Hottenga<sup>5</sup>,  
80 Gonneke Willemsen<sup>5</sup>, Elke Rodríguez<sup>9</sup>, Melanie Hotze<sup>9</sup>, Andre Franke<sup>10</sup>, Melanie C Matheson<sup>11</sup>,  
81 Shyamali C Dharmage<sup>11</sup>, Andreas Arnold<sup>12</sup>, Georg Homuth<sup>13</sup>, Carsten O Schmidt<sup>14</sup>, Philip J  
82 Thompson<sup>15</sup>, Nicholas G Martin<sup>16</sup>, David L Duffy<sup>16</sup>, Natalija Novak<sup>17</sup>, Holger Schulz<sup>18,19</sup>, Stefan  
83 Karrasch<sup>18,20</sup>, Christian Gieger<sup>21</sup>, Konstantin Strauch<sup>22,23</sup>, Ronald B Melles<sup>24</sup> and David A Hinds<sup>25</sup>

84

85 1 Max Delbrück Center (MDC) for Molecular Medicine, Berlin, Germany

86 2 Clinic for Pediatric Allergy, Experimental and Clinical Research Center of Charité  
87 Universitätsmedizin Berlin and Max Delbrück Center, Berlin, Germany

88 3 Current address: GlaxoSmithKline, Stevenage, UK

89 4 Epidemiology and Biostatistics, University of California San Francisco, San Francisco, California,  
90 USA

91 5 Department Biological Psychology, Netherlands Twin Register , Vrije University, Amsterdam, The  
92 Netherlands

93 9 Department of Dermatology, Allergology and Venereology, University Hospital Schleswig-Holstein,  
94 Campus Kiel, Kiel, Germany

95 10 Institute of Clinical Molecular Biology, Christian Albrechts University of Kiel, Kiel, Germany

96 11 Melbourne School of Population and Global Health, University of Melbourne, Melbourne, Australia

97 12 Clinic and Polyclinic of Dermatology, University Medicine Greifswald, Greifswald, Germany

98 13 Department of Functional Genomics, Interfaculty Institute for Genetics and Functional Genomics,  
99 University Medicine and Ernst-Moritz-Arndt-University Greifswald, Greifswald, Germany

100 14 Institute for Community Medicine, Study of Health in Pomerania/KEF, University Medicine

101 Greifswald, Greifswald, Germany  
102 15 Institute for Respiratory Health, Harry Perkins Institute of Medical Research, University of Western  
103 Australia, Nedlands, Australia  
104 16 Genetics and Computational Biology, QIMR Berghofer Medical Research Institute, Brisbane,  
105 Australia  
106 17 Department of Dermatology and Allergology, University-Hospital Bonn, Bonn, Germany  
107 18 Institute of Epidemiology I, Helmholtz Zentrum Munchen - German Research Center for  
108 Environmental Health , Neuherberg, Germany  
109 19 Comprehensive Pneumology Center Munich (CPC-M), Member of the German Center for Lung  
110 Research, Munich, Germany  
111 20 Institute and Outpatient Clinic for Occupational, Social and Environmental Medicine, Ludwig-  
112 Maximilians-Universität, Munich, Germany  
113 21 Research Unit of Molecular Epidemiology and Institute of Epidemiology II,, Helmholtz Zentrum  
114 Munchen - German Research Center for Environmental Health , Neuherberg, Germany  
115 22 Institute of Genetic Epidemiology, Helmholtz Zentrum Munchen - German Research Center for  
116 Environmental Health , Neuherberg, Germany  
117 23 Chair of Genetic Epidemiology, IBE, Faculty of Medicine, LMU Munich, Germany  
118 24 Division of Research, Kaiser Permanente Northern California, Oakland, California, USA  
119 25 23andMe, Inc., Mountain View, California, USA  
120

121 **Acknowledgments**

122

123 23andMe: We would like to thank the research participants and employees of 23andMe for making this  
124 work possible. We particularly thank the following members of the 23andMe Research Team: Michelle  
125 Agee, Babak Alipanahi, Adam Auton, Robert K. Bell, Katarzyna Bryc, Sarah L. Elson, Pierre  
126 Fontanillas, Nicholas A. Furlotte, Bethann S. Hromatka, Karen E. Huber, Aaron Kleinman, Nadia K.  
127 Litterman, Jennifer C. McCreight, Matthew H. McIntyre, Joanna L. Mountain, Elizabeth S. Noblin,  
128 Carrie A.M. Northover, Steven J. Pitts, J. Fah Sathirapongsasuti, Olga V. Sazonova, Janie F. Shelton,  
129 Suyash Shringarpure, Joyce Y. Tung, Vladimir Vacic, and Catherine H. Wilson.

130

131 LifeLines: The LifeLines Biobank initiative has been made possible by funds from FES (Fonds  
132 Economische Structuurversterking), SNN (Samenwerkingsverband Noord Nederland) and REP  
133 (Ruimtelijk Economisch Programma). The authors wish to acknowledge the services of the LifeLines  
134 Cohort Study, the contributing research centres delivering data to LifeLines, and all the study  
135 participants.

136

137 SALTY/TWINGENE/CATSS: We acknowledge funding from the Swedish Research Council. Financial  
138 support was provided by the Swedish Research Council through the Swedish Initiative for research on  
139 Microdata in the Social and Medical Sciences (SIMSAM) framework grant number 340-2013-5867 and  
140 grants from the Swedish Heart-Lung Foundation. Computations were performed on resources provided  
141 by the Swedish National Infrastructure for Computing (SNIC) at UPPMAX.

142

143 ALSPAC: The UK Medical Research Council and the Wellcome Trust (Grant ref: 102215/2/13/2) and  
144 the University of Bristol provide core support for ALSPAC. ALSPAC GWAS data was generated by

145 Sample Logistics and Genotyping Facilities at the Wellcome Trust Sanger Institute and LabCorp  
146 (Laboratory Corporation of America) using support from 23andMe.

147

148 AAGC: The AAGC was funded by a grant from the NHMRC (project ID 613627).

149

150 GENEVA: The project received infrastructure support through the DFG Clusters of Excellence  
151 “Inflammation at Interfaces” (grants EXC306 and EXC306/2), and was supported by the German  
152 Federal Ministry of Education and Research (BMBF) within the framework of the e:Med research and  
153 funding concept (sysINFLAME, grant # 01ZX1306A), and the PopGen 2.0 network (01EY1103). The  
154 KORA study was initiated and financed by the Helmholtz Zentrum München – German Research  
155 Center for Environmental Health, which is funded by the German Federal Ministry of Education and  
156 Research (BMBF) and by the State of Bavaria. Furthermore, KORA research was supported within the  
157 Munich Center of Health Sciences (MC-Health), Ludwig-Maximilians-Universität, as part of  
158 LMUinnovativ.

159

160 NTR: This study was supported by multiple grants from the Netherlands Organization for Scientific  
161 Research (NWO: 016-115-035, 463-06-001, 451- 04-034); ZonMW (31160008, 911-09-032); and  
162 NWO 480-15-001/674: Netherlands Twin Registry Repository: researching the interplay between  
163 genome and environment; The Amsterdam Public Health Institute (APH) and Neuroscience Campus  
164 Amsterdam (NCA); Biomolecular Resources Research Infrastructure (BBMRI–NL, 184.021.007),  
165 European Research Council (ERC-230374); Genotyping was made possible by grants from NWO/SPI  
166 56-464-14192, Genetic Association Information Network (GAIN) of the Foundation for the National  
167 Institutes of Health, Rutgers University Cell and DNA Repository (NIMH U24 MH068457-06), the  
168 Avera Institute, Sioux Falls (USA) and the National Institutes of Health (NIH R01 HD042157-01A1,

169 MH081802, Grand Opportunity grants 1RC2 MH089951 and 1RC2 MH089995).

170

171 GENUFAD-SHIP-1. We thank all individuals and families for their participation in this study. We thank  
172 all physicians and nurses involved in patient recruitment for their valuable contribution to the study. We  
173 are grateful to the laboratory technicians C. Flachmeier and T. Thuss for their work. The study was  
174 funded by the German Ministry of Education and Research (BMBF) through the Clinical Research  
175 Group for Allergy at Charité Berlin, the National Genome Research Network (NGFN). The SHIP  
176 authors are grateful to Mario Stanke for the opportunity to use his server cluster for SNP imputation.  
177 We thank all staff members and participants of the SHIP studies, as well as all of the genotyping staff  
178 for generating the SHIP SNP data set. SHIP is part of the Community Medicine Research net of the  
179 University of Greifswald, Germany, which is funded by the Federal Ministry of Education and  
180 Research (grants no. 01ZZ9603, 01ZZ0103, and 01ZZ0403), the Ministry of Cultural Affairs as well as  
181 the Social Ministry of the Federal State of Mecklenburg-West Pomerania, and the network ‘Greifswald  
182 Approach to Individualized Medicine (GANI\_MED)’ funded by the Federal Ministry of Education and  
183 Research (grant 03IS2061A). Genome-wide data were supported by the Federal Ministry of Education  
184 and Research (grant 03ZIK012) and a joint grant from Siemens Healthcare, Erlangen, Germany, and  
185 the Federal State of Mecklenburg–West Pomerania. The University of Greifswald is a member of the  
186 ‘Center of Knowledge Interchange’ program of the Siemens AG and the Caché Campus program of the  
187 InterSystems GmbH.

188

189 GENUFAD-SHIP-2. We thank all individuals and families for their participation in this study. We thank  
190 all physicians and nurses involved in patient recruitment for their valuable contribution to the study. We  
191 are grateful to the laboratory technicians C. Flachmeier and T. Thuss for their work. The study was  
192 funded by the German Ministry of Education and Research (BMBF) through the Clinical Research

193 Group for Allergy at Charité Berlin, the National Genome Research Network (NGFN). The SHIP  
194 authors are grateful to Mario Stanke for the opportunity to use his server cluster for SNP imputation.  
195 We thank all staff members and participants of the SHIP studies, as well as all of the genotyping staff  
196 for generating the SHIP SNP data set. SHIP is part of the Community Medicine Research net of the  
197 University of Greifswald, Germany, which is funded by the Federal Ministry of Education and  
198 Research (grants no. 01ZZ9603, 01ZZ0103, and 01ZZ0403), the Ministry of Cultural Affairs as well as  
199 the Social Ministry of the Federal State of Mecklenburg-West Pomerania, and the network 'Greifswald  
200 Approach to Individualized Medicine (GANI\_MED)' funded by the Federal Ministry of Education and  
201 Research (grant 03IS2061A). Genome-wide data were supported by the Federal Ministry of Education  
202 and Research (grant 03ZIK012) and a joint grant from Siemens Healthcare, Erlangen, Germany, and  
203 the Federal State of Mecklenburg–West Pomerania. The University of Greifswald is a member of the  
204 'Center of Knowledge Interchange' program of the Siemens AG and the Caché Campus program of the  
205 InterSystems GmbH.

206

207



208  
209  
210  
211  
212  
213  
214  
215  
216

## **References**

1. Ferreira MA, Vonk JM, Baurecht H, Marenholz I, Tian C, Hoffman JD, et al. Shared genetic origin of asthma, hay fever and eczema elucidates allergic disease biology. *Nat Genet* 2017; 49:1752-7.
2. Yang J, Ferreira T, Morris AP, Medland SE, Madden PA, Heath AC, et al. Conditional and joint multiple-SNP analysis of GWAS summary statistics identifies additional variants influencing complex traits. *Nat Genet* 2012; 44:369-75, S1-3.

217 **Figure E1.** Distribution of the observed and expected single-SNP association P-values obtained after  
218 adjusting the results from Ferreira et al.<sup>1</sup> (which included a correction for an inflation factor of 1.04;  
219 see Methods for details) for the effects of the 136 independent associations identified in that study. The  
220 genomic inflation factor ( $\lambda$ , estimated as the median chi-square divided by 0.4549) of the single-SNP  
221 results after the conditional analysis is also shown ( $\lambda = 1.17$ ); before the conditional analysis,  $\lambda$  was  
222 1.19. The intercept of LD-score regression was 1.00, both before and after the conditional analysis.

223

224 **Figure E2.** Comparison of results from the EUGENE gene-based test obtained before (x-axis) and after  
225 (y-axis) adjusting the Ferreira et al.<sup>1</sup> GWAS results for the effects of the sentinel risk SNPs identified in  
226 that GWAS. The vertical and horizontal blue lines indicate the P-value threshold used to identify  
227 significant associations after accounting for multiple testing ( $P=2.5 \times 10^{-6}$ ).
